# Supplementary material for: Distribution, contamination and source discrimination of heavy metals in sediments from dam reservoir at Changsha city along the Xiangjiang River, China
Source: Research Square preprint supplement (doi:10.21203/rs.3.rs-7302369/v1), 2025-08-18
Supplement: Supplementary file 1 [file afe0a8ddc33720fecf60ae2b.xlsx]

## Sheet: major and trace metals
						Table1 Concentrations of major (wt.%) and trace elements (mg/kg) in bed sediments from Changsha dam reservoir in lower reach of the Xiangjiang River, China.
								Dam reservoir sediments (DS)(after 2014)
								YP(n=22)																					FY(n=12)													SW(n=10)
Sample ID(mass%)	UCCa	NASCb	YZc	HGRd	CASf	XJRg	Sample ID(mass%)	YP1	YP2	YP5	YP6	YP7	YP8	YP9	YP10	YP11	YP12	YP13	YP14	YP15	YP16	YP17	YP18	YP19	YP20	YP21	YP22		FY1	FY2	FY3	FY4	FY5	FY6	FY7	FY8	FY9	SC1	SC2	SC3		SW1	SW2	SW3	SW4	SW5	SW6	SW7	SW8
Major elements(%)							Major elements(%)
SiO2	65.46	62.8	61.6	71.62	65	63.77	SiO2	79.654	65.6243	69.7772	66.2905	73.0578	76.7893	77.5264	74.793	72.7664	73.4047	74.7972	77.3207	71.3566	71.5027	70.1963	71.3509	65.2984	65.7686	68.1041	63.7453		72.093	66.7634	73.2809	71.9128	64.4061	63.9299	70.2584	67.9671	71.171	72.6547	71.7105	78.4255		67.3801	68.7975	66.7093	65.2194	69.3724	66.0261	63.4803	61.5858
TiO2	0.65	1	0.918	0.33	0.258	0.88	TiO2	0.583918	0.69997	0.638842	0.694185	0.675033	0.680692	0.616982	0.638528	0.643063	0.619084	0.520671	0.612936	0.642144	0.652727	0.628788	0.607294	0.695433	0.688528	0.658542	0.721263		0.671125	0.740825	0.636976	0.680894	0.732924	0.750481	0.687681	0.700835	0.672426	0.6371	0.681749	0.602602		0.694083	0.670735	0.681115	0.781103	0.645906	0.721784	0.752355	0.767185
Al2O3	13.65	15.12	12.3	13.37	12.6	14.6	Al2O3	7.99884	14.5718	12.5235	14.0653	10.7941	8.95637	8.64817	9.90784	10.9086	11.0793	9.56734	8.66907	11.6021	11.7315	12.3286	11.746	14.7734	14.6036	13.0901	15.5981		11.1163	13.2251	10.4704	11.243	14.5161	14.7135	11.7904	12.8774	11.3383	11.5531	11.5451	8.55469		13.8569	13.0716	13.9151	14.1673	12.5099	14.1407	15.5541	16.4949
Fe2O3	5.35	6.5	5.5	0.88	4.7	6.69	Fe2O3	3.74028	6.28252	5.33276	6.21856	5.26344	4.61293	4.24389	4.81335	5.07538	5.03828	4.23677	4.25354	5.16516	5.21984	5.35301	5.3559	6.2236	6.29135	5.75096	6.47896		5.1661	5.77282	4.73714	5.33891	6.16791	6.20141	5.26495	5.45991	4.91545	4.86915	5.44561	4.12199		5.73149	6.05407	5.86476	7.24542	5.19289	6.11885	6.56093	6.95556
MnO	0.1	0.077	0.105	0.08	0.04	0.16	MnO	0.0987166	0.30329	0.220708	0.29253	0.185611	0.165271	0.160169	0.187203	0.195918	0.169433	0.132027	0.164697	0.212814	0.215114	0.226071	0.206515	0.299219	0.310889	0.266902	0.265157		0.173823	0.194115	0.182785	0.172505	0.248263	0.215729	0.195942	0.22156	0.190646	0.150843	0.162779	0.156752		0.236245	0.238446	0.291907	0.244891	0.206463	0.254429	0.344037	0.404778
MgO	2.52	2.2	2.2	0.61	1.8	1.04	MgO	0.759931	1.16045	1.06163	1.13527	0.959452	0.964547	0.895618	0.957328	0.977718	0.900232	0.886071	0.918936	1.01133	1.04695	1.07544	1.0352	1.16943	1.15486	1.18776	1.22443		0.985308	1.10936	0.976697	0.995784	1.16921	1.16183	1.02022	1.07721	0.997369	0.832915	0.945171	0.782819		1.05578	1.05499	1.09851	1.01507	0.983066	1.10704	1.1652	1.18729
CaO	3.31	1.3	4	1.55	3.2	0.69	CaO	0.825122	0.853465	0.883763	0.840908	0.79231	1.02804	0.92026	0.891529	0.849293	0.687974	1.08039	0.97134	0.863286	0.893691	0.922588	0.885564	0.866546	0.838486	1.14098	1.00271		1.03922	1.21252	1.1641	1.00948	1.17925	1.13075	1.13703	1.15601	1.111	0.596813	0.704503	0.742458		0.821362	0.841421	1.00303	0.878513	0.928135	0.843585	0.818446	0.820374
K2O	2.75	3.7	1.2	3.04	1.6	2.29	K2O	2.03673	2.45683	2.21825	2.3705	2.19686	1.87494	2.02722	2.00455	2.35383	2.48844	2.13196	1.9511	2.19569	2.1022	2.08406	1.70462	2.41389	2.3655	2.17649	2.31673		2.04312	2.26936	1.87862	1.89391	2.25993	2.29989	2.14123	2.20355	2.10743	3.17238	1.81683	1.96362		2.36061	1.8175	2.32889	2.15213	2.56658	2.31061	2.4825	2.57832
Na2O	2.58	1.2	2.2	4.61	2.5	0.44	Na2O	0.499992	0.415207	0.479038	0.41564	0.49868	0.496326	0.497798	0.502477	0.519385	0.501803	0.561876	0.52448	0.471952	0.453101	0.454025	0.415953	0.40689	0.399737	0.458923	0.407174		0.45724	0.420186	0.474805	0.43027	0.406821	0.397658	0.44735	0.422243	0.474108	0.5502	0.436612	0.49294		0.434626	0.385521	0.447156	0.378461	0.49947	0.425236	0.367611	0.349608
P2O5	0.15	0.16	0.149	0.14	0.014	0.19	P2O5	0.126655	0.193255	0.167626	0.180653	0.131128	0.114849	0.1052	0.125111	0.133112	0.12661	0.170148	0.108551	0.14897	0.15418	0.161087	0.150511	0.191244	0.191105	0.175183	0.203619		0.165457	0.233501	0.161552	0.166116	0.242787	0.249551	0.195942	0.211363	0.192524	0.136789	0.161029	0.110759		0.193208	0.172401	0.200061	0.197552	0.185627	0.197588	0.204612	0.20915
LOI	0.91	3.28	3.91	1.06	0.8	2.6	LOI	3.47334	7.41024	6.64151	7.1205	5.13447	4.17652	3.74904	4.8105	5.40759	4.90937	5.37975	4.0182	5.82666	5.76923	6.39535	6.04478	7.41646	7.15867	6.98795	8.10811		6.03514	7.68645	5.67752	5.90875	8.28937	8.75093	6.82643	7.50751	6.60015	4.32653	5.9542	3.7234		7.04981	6.84089	7.35931	7.65111	6.61094	7.89877	8.14758	8.52535
Total	97.43	97.337	94.082	97.29	92.512	93.35	Total	99.7976	99.9713	99.9449	99.6246	99.6889	99.8598	99.3908	99.6314	99.8303	99.9252	99.4643	99.5136	99.4967	99.7412	99.8254	99.5032	99.7545	99.7712	99.9979	100.072		99.9458	99.6276	99.6415	99.7523	99.6186	99.8016	99.9656	99.8046	99.7704	99.4805	99.5641	99.6775		99.8142	99.9452	99.8992	99.9309	99.7014	100.045	99.8777	99.8783
Mole mass							Mole mass
SiO2	1.08937	1.0451	1.02513	1.19188	1.08171	1.06124	SiO2	1.32558	1.0921	1.16121	1.10319	1.21581	1.2779	1.29017	1.24468	1.21096	1.22158	1.24475	1.28675	1.1875	1.18993	1.16819	1.1874	1.08668	1.0945	1.13337	1.06083		1.19975	1.11106	1.21952	1.19675	1.07183	1.0639	1.16922	1.13109	1.18441	1.2091	1.19338	1.30513		1.12132	1.14491	1.11016	1.08536	1.15448	1.09879	1.05642	1.02489
TiO2	0.00813822	0.0125203	0.0114937	0.00413171	0.00323025	0.0110179	TiO2	0.00731085	0.00876387	0.00799853	0.00869144	0.00845165	0.00852249	0.00772482	0.00799459	0.00805137	0.00775114	0.00651899	0.00767417	0.00803986	0.00817236	0.00787264	0.00760353	0.00870707	0.0086206	0.00824517	0.00903046		0.00840272	0.00927539	0.00797517	0.00852502	0.00917646	0.00939629	0.00861001	0.00877469	0.008419	0.00797671	0.00853573	0.00754478		0.00869016	0.00839784	0.0085278	0.00977968	0.00808697	0.00903699	0.00941975	0.00960542
Al2O3	0.133876	0.148293	0.120636	0.13113	0.123578	0.143193	Al2O3	0.0784507	0.142917	0.122828	0.137949	0.105866	0.087842	0.0848192	0.0971738	0.106989	0.108663	0.0938342	0.0850242	0.11379	0.11506	0.120916	0.115202	0.144894	0.143228	0.128385	0.152983		0.109026	0.129709	0.102691	0.110268	0.142371	0.144306	0.115638	0.126298	0.111203	0.11331	0.113232	0.0839024		0.135906	0.128203	0.136476	0.138949	0.122695	0.138688	0.152551	0.161778
Fe2O3	0.0335003	0.0407013	0.0344396	0.00551033	0.0294302	0.041891	Fe2O3	0.0234207	0.0393395	0.0333924	0.038939	0.0329583	0.028885	0.0265741	0.03014	0.0317807	0.0315484	0.0265295	0.0266346	0.0323429	0.0326853	0.0335191	0.0335372	0.0389705	0.0393948	0.036011	0.0405696		0.0323488	0.0361479	0.0296628	0.0334308	0.0386219	0.0388316	0.0329677	0.0341886	0.0307793	0.0304893	0.034099	0.0258108		0.0358891	0.037909	0.0367236	0.0453689	0.0325165	0.0383146	0.0410828	0.0435539
MnO	0.00140964	0.00108542	0.00148012	0.00112771	0.000563857	0.00225543	MnO	0.00139155	0.0042753	0.00311119	0.00412362	0.00261645	0.00232973	0.00225781	0.00263889	0.00276175	0.00238841	0.00186111	0.00232164	0.00299992	0.00303233	0.00318679	0.00291112	0.00421792	0.00438242	0.00376236	0.00373776		0.00245029	0.00273633	0.00257661	0.00243171	0.00349962	0.00304101	0.00276208	0.00312321	0.00268742	0.00212634	0.00229461	0.00220964		0.0033302	0.00336123	0.00411484	0.00345209	0.00291039	0.00358654	0.00484969	0.00570592
MgO	0.0625155	0.054577	0.054577	0.0151327	0.0446539	0.0258	MgO	0.0188522	0.0287882	0.0263367	0.0281635	0.0238018	0.0239282	0.0222183	0.0237492	0.024255	0.0223327	0.0219814	0.0227967	0.0250888	0.0259724	0.0266792	0.025681	0.0290108	0.0286495	0.0294656	0.0303753		0.0244433	0.0275208	0.0242297	0.0247032	0.0290055	0.0288224	0.0253093	0.0267231	0.0247425	0.0206627	0.0234476	0.01942		0.0261914	0.026172	0.0272517	0.0251816	0.0243876	0.0274631	0.028906	0.029454
CaO	0.0590228	0.0231812	0.0713267	0.0276391	0.0570613	0.0123039	CaO	0.0147133	0.0152187	0.015759	0.0149948	0.0141282	0.0183317	0.0164098	0.0158975	0.0151443	0.0122677	0.0192652	0.0173206	0.0153938	0.015936	0.0164513	0.0157911	0.015452	0.0149516	0.0203456	0.01788		0.018531	0.0216212	0.0207578	0.0180006	0.021028	0.0201632	0.0202751	0.0206135	0.0198111	0.0106422	0.0125625	0.0132393		0.0146463	0.0150039	0.0178857	0.0156654	0.0165502	0.0150425	0.0145943	0.0146286
K2O	0.0292491	0.0393533	0.0127632	0.0323335	0.0170177	0.0243565	K2O	0.0216627	0.0261309	0.0235934	0.0252127	0.0233659	0.0199419	0.0215616	0.0213205	0.0250355	0.0264671	0.0226756	0.020752	0.0233534	0.0223591	0.0221661	0.0181304	0.0256742	0.0251595	0.0231492	0.0246408		0.0217307	0.024137	0.0199811	0.0201437	0.0240366	0.0244617	0.0227742	0.023437	0.0224147	0.0337416	0.0193239	0.0208851		0.0251076	0.019331	0.0247701	0.0228901	0.0272982	0.0245757	0.026404	0.0274231
Na2O	0.0416263	0.0193611	0.0354953	0.0743788	0.0403356	0.00709906	Na2O	0.00806699	0.00669904	0.00772891	0.00670603	0.00804582	0.00800784	0.00803159	0.00810709	0.00837988	0.0080962	0.00906544	0.00846209	0.00761459	0.00731044	0.00732535	0.00671108	0.00656486	0.00644945	0.00740437	0.00656943		0.00737722	0.00677939	0.00766061	0.00694207	0.00656374	0.00641591	0.00721765	0.00681257	0.00764938	0.00887706	0.0070444	0.00795321		0.00701236	0.00622008	0.00721452	0.00610618	0.00805857	0.00686085	0.00593113	0.00564066
P2O5	0.00105678	0.00112724	0.00104974	0.000986332	9.86332e-05	0.00133859	P2O5	0.000892315	0.00136152	0.00118097	0.00127274	0.000923828	0.000809139	0.000741156	0.000881433	0.000937805	0.000891994	0.00119873	0.000764763	0.00104953	0.00108623	0.00113489	0.00106038	0.00134736	0.00134638	0.00123421	0.00143454		0.00116569	0.00164507	0.00113817	0.00117033	0.00171049	0.00175814	0.00138046	0.0014891	0.00135638	0.000963711	0.00113449	0.00078032		0.00136119	0.00121461	0.00140947	0.0013918	0.00130779	0.00139206	0.00144154	0.00147351
Total	1.45976	1.3853	1.36839	1.48425	1.39768	1.3305	Total	1.50034	1.36559	1.40314	1.36924	1.43596	1.4765	1.48051	1.45259	1.43429	1.44199	1.44768	1.4785	1.41717	1.42154	1.40744	1.41403	1.36152	1.36668	1.39137	1.34805		1.42523	1.37063	1.43619	1.42237	1.34784	1.3411	1.40615	1.38255	1.41347	1.43789	1.41506	1.48688		1.37945	1.39072	1.37453	1.35415	1.39829	1.36375	1.3416	1.32416
Mole%							Mole%
SiO2	74.6263	75.4421	74.915	80.3018	77.3933	79.7628	SiO2	88.3519	79.9725	82.758	80.5693	84.6683	86.5494	87.1437	85.6874	84.4289	84.7151	85.9824	87.0307	83.7935	83.7068	83.0009	83.9729	79.8138	80.0844	81.4569	78.6937		84.1796	81.0618	84.9134	84.138	79.5218	79.3306	83.1502	81.8118	83.7943	84.0885	84.3347	87.7767		81.2872	82.3248	80.7662	80.151	82.5636	80.5711	78.7433	77.3997
TiO2	0.557504	0.903801	0.839942	0.278371	0.231115	0.828104	TiO2	0.48728	0.641763	0.570044	0.634763	0.58857	0.577208	0.521768	0.550369	0.561348	0.537532	0.450305	0.519051	0.567319	0.574895	0.55936	0.537721	0.639513	0.630768	0.592594	0.66989		0.589571	0.676725	0.555299	0.599355	0.680828	0.700641	0.612309	0.634676	0.595627	0.554752	0.603207	0.507424		0.629971	0.603848	0.620416	0.722202	0.578349	0.662658	0.702127	0.7254
Al2O3	9.17109	10.7048	8.81588	8.83476	8.84164	10.7624	Al2O3	5.22886	10.4655	8.75379	10.0748	7.37245	5.94933	5.72905	6.68971	7.45938	7.53564	6.48168	5.75071	8.02942	8.09405	8.59124	8.14706	10.6421	10.48	9.22723	11.3484		7.64976	9.46348	7.15025	7.75245	10.5629	10.7603	8.2237	9.13518	7.86738	7.88029	8.0019	5.64285		9.85214	9.21848	9.92894	10.261	8.77464	10.1696	11.3708	12.2175
Fe2O3	2.29492	2.93809	2.5168	0.371254	2.10565	3.14853	Fe2O3	1.56103	2.88076	2.37983	2.84384	2.2952	1.95631	1.79493	2.07492	2.21578	2.18784	1.83255	1.80146	2.28222	2.29929	2.38157	2.37175	2.86229	2.88251	2.58817	3.0095		2.26973	2.63733	2.06538	2.35037	2.86546	2.89551	2.34453	2.47287	2.17757	2.12043	2.40972	1.7359		2.60169	2.72585	2.67172	3.35037	2.32546	2.80951	3.06223	3.28918
MnO	0.0965666	0.078353	0.108165	0.0759787	0.0403423	0.169518	MnO	0.092749	0.313072	0.22173	0.301161	0.182209	0.157787	0.152502	0.181668	0.192551	0.165633	0.128558	0.157027	0.211684	0.213313	0.226425	0.205874	0.309796	0.320661	0.270407	0.277271		0.171923	0.19964	0.179405	0.170962	0.259647	0.226755	0.196428	0.225902	0.19013	0.14788	0.162156	0.148609		0.241415	0.24169	0.299363	0.254927	0.208139	0.262991	0.361486	0.43091
MgO	4.28259	3.93973	3.98841	1.01955	3.19486	1.93913	MgO	1.25653	2.10811	1.87698	2.05687	1.65755	1.6206	1.50072	1.63496	1.69108	1.54875	1.51839	1.54188	1.77035	1.82706	1.89558	1.81616	2.13077	2.09628	2.11774	2.25327		1.71505	2.00789	1.68708	1.73676	2.152	2.14916	1.79989	1.93289	1.75048	1.43702	1.657	1.30609		1.89868	1.8819	1.98262	1.85959	1.74411	2.01379	2.15459	2.22436
CaO	4.04332	1.67337	5.21245	1.86216	4.08258	0.924756	CaO	0.980664	1.11444	1.12312	1.09512	0.983883	1.24156	1.10839	1.09442	1.05587	0.850752	1.33076	1.1715	1.08624	1.12104	1.16888	1.11674	1.13491	1.09401	1.46227	1.32636		1.30022	1.57746	1.44534	1.26554	1.56013	1.50348	1.44189	1.49098	1.40159	0.740125	0.88777	0.890406		1.06174	1.07886	1.30122	1.15684	1.18361	1.10303	1.08783	1.10475
K2O	2.00369	2.84078	0.93272	2.17844	1.21756	1.83063	K2O	1.44385	1.91352	1.68147	1.84137	1.62719	1.35062	1.45637	1.46776	1.74549	1.83546	1.56634	1.40358	1.64789	1.57288	1.57493	1.28218	1.8857	1.84092	1.66377	1.82788		1.52472	1.76102	1.39125	1.41621	1.78335	1.82401	1.61961	1.69521	1.5858	2.34661	1.36559	1.40463		1.82011	1.39	1.80208	1.69037	1.95226	1.80207	1.96809	2.07099
Na2O	2.85159	1.39761	2.59395	5.01121	2.8859	0.533565	Na2O	0.537677	0.490559	0.550829	0.489763	0.560308	0.542352	0.542488	0.558114	0.584252	0.561462	0.626203	0.572343	0.53731	0.514262	0.520474	0.474607	0.482173	0.471905	0.532164	0.487328		0.517618	0.494619	0.533397	0.488065	0.486982	0.478407	0.51329	0.492755	0.541177	0.617368	0.497817	0.534893		0.508343	0.447256	0.524872	0.450925	0.576318	0.503088	0.442093	0.425982
P2O5	0.0723944	0.0813714	0.0767135	0.0664533	0.00705692	0.100609	P2O5	0.0594742	0.099702	0.0841659	0.0929525	0.0643351	0.0548011	0.0500608	0.0606803	0.0653845	0.0618587	0.0828034	0.0517257	0.0740581	0.0764125	0.0806354	0.0749903	0.0989602	0.0985144	0.0887043	0.106416		0.0817895	0.120023	0.0792492	0.0822802	0.126906	0.131097	0.0981725	0.107707	0.0959608	0.0670227	0.0801725	0.0524803		0.0986763	0.0873364	0.102542	0.10278	0.0935277	0.102076	0.107449	0.111279
Total	100	100	100	100	100	100	Total	100	100	100	100	100	100	100	100	100	100	100	100	100	100	100	100	100	100	100	100		100	100	100	100	100	100	100	100	100	100	100	100		100	100	100	100	100	100	100	100
Normalization							Normalization
Ratios							Ratios
Pb	18	20	27	45.84	26	38.69	Pb	48.55	91.09	79.23	89.39	60.66	61.82	54.16	59.99	64.85	66.59	51.96	57.78	71.1	68.95	76.17	73.85	88.7	96.52	92.53	111		72.41	75.44	57.88	64.43	89.67	87.86	72.34	75.62	66.38		78.87	61.39		76.01	74.25	88.98	86.95	75.79	78.4	83.22	93.14
Zn	70	71	78	63.81	74.2	113.8	Zn	160.3	260	264.9	262.3	195.2	210.2	187	200.6	226.8	224.4	186.6	178.4	220.8	211.7	240.6	228.3	265.6	267	284.5	318.7		207.5	276.2	203.5	207.4	316.4	326	285.5	270.5	240.6		287.7	210.4		252	228.9	279.8	255.1	238.4	244.6	244.5	255.5
Ni	38	55	33	8.98	26.9	48.5	Ni	96.89	124.8	120	127.6	304.7	107.9	7699.5	426.1	306.8	696.6	588.3	620.1	819.3	710.1	793.4	1962.5	4680.9	51.48	44.28	53.15		34.84	41.76	31.94	50.17	133	145.3	113.7	118.9	107	31.07	35.51	23.67		43.97	43.87	44.9	43.65	40.15	737.9	54.76	61.27
SiO2/Al2O3	8.13712	7.04751	8.49774	9.0893	8.75327	7.41125	SiO2/Al2O3	16.897	7.64152	9.45397	7.99707	11.4844	14.5478	15.2108	12.8088	11.3185	11.2419	13.2655	15.1339	10.4358	10.3418	9.66111	10.3071	7.49981	7.64166	8.82789	6.93433		11.0042	8.56575	11.8756	10.8531	7.52843	7.37253	10.111	8.95568	10.6508	10.6707	10.5393	15.5554		8.25072	8.93041	8.13443	7.8112	9.40934	7.92271	6.92503	6.33516
K2O/Na2O	0.702659	2.0326	0.359575	0.434714	0.421902	3.43095	K2O/Na2O	2.68535	3.9007	3.05262	3.75971	2.9041	2.4903	2.6846	2.62986	2.98757	3.26908	2.50133	2.45235	3.06693	3.05852	3.02595	2.70157	3.91085	3.90104	3.12643	3.75083		2.94565	3.56035	2.60829	2.90168	3.66203	3.81267	3.15535	3.44026	2.93027	3.80099	2.74315	2.626		3.58048	3.10784	3.43337	3.74868	3.38748	3.58203	4.45176	4.86168
Fe2O3/K2O	1.14535	1.03425	2.69834	0.170422	1.72939	1.71991	Fe2O3/K2O	1.08115	1.50548	1.41533	1.54442	1.41053	1.44846	1.23247	1.41366	1.26943	1.19198	1.16996	1.28347	1.38493	1.46183	1.51218	1.84978	1.51789	1.5658	1.5556	1.64644		1.48862	1.49761	1.48454	1.65962	1.60679	1.58744	1.44759	1.45874	1.37317	0.903613	1.76461	1.23585		1.42941	1.96105	1.48258	1.98203	1.19116	1.55904	1.55593	1.58822
(TiO2+Fe2O3+MgO)/Al2O3	0.777989	0.726928	0.833173	0.188933	0.625633	0.549669	(TiO2+Fe2O3+MgO)/Al2O3	0.632036	0.538017	0.551402	0.549435	0.615986	0.69825	0.666326	0.636835	0.599004	0.567187	0.586459	0.671638	0.575369	0.580827	0.562959	0.580041	0.529273	0.535264	0.574225	0.522774		0.597973	0.562367	0.602461	0.604516	0.539464	0.533936	0.578418	0.55176	0.574991	0.521833	0.583603	0.629011		0.520734	0.565343	0.53125	0.578126	0.529699	0.539445	0.520538	0.510657
(K2O+Na2O)/Al2O3	0.529411	0.395934	0.400036	0.813792	0.464106	0.219672	(K2O+Na2O)/Al2O3	0.37896	0.229714	0.25501	0.231381	0.296713	0.318182	0.348898	0.302834	0.312324	0.318078	0.338268	0.343597	0.272149	0.257861	0.2439	0.215635	0.222501	0.22069	0.237984	0.204012		0.266981	0.238352	0.269172	0.245635	0.214935	0.213973	0.25936	0.239509	0.270353	0.376125	0.23287	0.343713		0.23634	0.199301	0.23436	0.208683	0.288169	0.226671	0.211962	0.204377
CIA	50.754	64.4225	50.2186	49.3933	51.9251	76.5933	CIA	67.486	78.3338	75.8763	78.1254	72.8484	70.955	69.2718	72.1364	71.9089	71.8089	69.6923	69.2942	74.6789	75.6775	76.6588	78.4997	78.8762	79.0065	77.1809	80.1954		74.9263	77.4823	74.4175	76.4181	79.2997	79.4639	75.6558	77.3126	74.6747	68.7536	77.2152	69.5167		77.6435	80.1398	77.6866	79.8322	73.8635	78.3613	79.9461	80.6944
WIP	42.8589	37.4806	34.1622	49.8561	35.6134	21.1697	WIP	16.7875	21.1545	19.4718	20.5146	18.8614	16.4795	17.1933	17.5452	20.0161	20.415	18.6907	17.03	18.9881	18.2864	18.4233	15.6655	20.8973	20.4273	19.4644	20.6076		17.8006	19.8521	16.8145	16.7456	20.1363	20.3972	18.6231	19.229	18.4969	24.7793	16.3216	16.5089		20.3016	16.4057	20.3686	18.8101	21.6726	20.2476	21.2965	22.0821
ICV	1.75881	1.2865	1.83674	1.2221	1.55605	0.871017	ICV	1.21628	0.904133	0.960043	0.919407	1.07087	1.25164	1.23531	1.13042	1.07869	1.02014	1.14987	1.24625	1.00916	1.00354	0.969269	0.958019	0.887528	0.890941	0.999988	0.868094		1.0574	0.988504	1.09886	1.03545	0.926679	0.908707	1.037	0.979211	1.04766	1.01065	0.947683	1.15685		0.889346	0.907894	0.926815	0.924394	0.976478	0.900439	0.859959	0.840728
Log (SiO2/Al2O3)	0.910471	0.848035	0.929303	0.958531	0.94217	0.869891		1.22781	0.88318	0.975614	0.902931	1.06011	1.1628	1.18215	1.10751	1.05379	1.05084	1.12272	1.17995	1.01853	1.01459	0.985027	1.01314	0.875051	0.883187	0.945857	0.841004		1.04156	0.932766	1.07465	1.03555	0.876704	0.867617	1.0048	0.952099	1.02738	1.02819	1.02281	1.19188		0.916492	0.950871	0.910327	0.892718	0.973559	0.898874	0.840422	0.801757
Log(Fe2O3/K2O)	0.0589364	0.014627	0.431097	-0.768476	0.237893	0.235506		0.0338869	0.177674	0.150856	0.188765	0.149383	0.160906	0.0907776	0.150346	0.103608	0.0762705	0.06817	0.108386	0.141428	0.164897	0.179603	0.267119	0.18124	0.194737	0.191899	0.216545		0.172784	0.1754	0.171593	0.220009	0.205959	0.200698	0.160646	0.163978	0.137725	-0.0440176	0.246648	0.091965		0.155158	0.292488	0.171017	0.29711	0.07597	0.192858	0.191991	0.200911
A-CN-K
A	50.754	64.4225	50.2186	49.3933	51.9251	76.5933		63.8362	74.839	72.2903	74.6225	69.9219	65.4934	64.8355	68.1927	68.7818	69.8824	64.7845	64.6282	71.0514	71.6146	72.4661	73.9258	75.2364	75.4672	71.6097	75.7067		69.5919	71.1723	67.9667	70.9784	73.3873	73.8717	69.7013	71.29	69.0367	68.0251	74.415	66.5998		74.3988	75.9686	73.2379	75.6759	70.2712	74.8989	76.4742	77.232
CN	38.1573	18.4814	44.4683	38.4275	40.9244	10.3785		18.5366	11.4773	13.8238	11.7389	14.6454	19.6383	18.6829	16.8454	15.1233	13.0963	19.5599	19.5978	14.3666	14.4688	14.2495	14.4398	11.4323	11.2762	15.4782	12.0993		16.5373	15.5836	18.8088	16.0553	14.2226	13.6061	16.5714	15.4808	17.0479	11.7183	12.8855	16.8221		11.8566	12.5766	13.4696	11.8574	14.0942	11.829	10.2894	9.67643
K	11.0887	17.0961	5.31313	12.1792	7.1505	13.0282		17.6272	13.6836	13.8859	13.6386	15.4326	14.8683	16.4816	14.9619	16.0949	17.0213	15.6556	15.7739	14.582	13.9165	13.2843	11.6344	13.3314	13.2566	12.912	12.194		13.8708	13.2442	13.2245	12.9662	12.3901	12.5222	13.7273	13.2292	13.9154	20.2566	12.6995	16.5781		13.7446	11.4549	13.2925	12.4666	15.6346	13.2722	13.2364	13.0916
total	100	100	100	100	100	100		100	100	100	100	100	100	100	100	100	100	100	100	100	100	100	100	100	100	100	100		100	100	100	100	100	100	100	100	100	100	100	100		100	100	100	100	100	100	100	100
Trace elements (mg/kg)							Trace elements (mg/kg)
Heavy metals							Heavy metals
(10-6)							(10-6)	YP1	YP2	YP5	YP6	YP7	YP8	YP9	YP10	YP11	YP12	YP13	YP14	YP15	YP16	YP17	YP18	YP19	YP20	YP21	YP22		FY1	FY2	FY3	FY4	FY5	FY6	FY7	FY8	FY9	SC1	SC2	SC3		SW1	SW2	SW3	SW4	SW5	SW6	SW7	SW8
Ba	678	650	512	374.7	469	512.1	Ba	357.2	471.7	449.8	492.6	374.3	382.5	357	410.6	403.9	426.2	342.6	363.7	451.2	432.5	433.9	427.8	498.5	496.6	494.2	510.3		414.6	419.6	414.5	389.1	490.2	476.1	414	442.7	406.9	470.5	383.8	341.9		436.4	411.9	477	431.3	414	434.8	504.2	541
Sc	15	15	13	5.07	11.1	14.76	Sc	7.944	13.29	12.06	13.78	9.225	10.17	8.316	10.14	10.43	10.62	9.044	8.956	11.64	11.25	11.83	11.35	13.83	13.83	12.6	14.66		11.22	13.63	10.66	11.13	14.23	15.37	11.83	12.82	11.48	10.44	11.37	8.487		12.79	12.07	13.21	14.31	11.93	13.4	14.5	15.54
V	98	130	97	30.51	82.4	106	V	47.03	109.1	90.2	115	62.29	70.6	57.42	69.46	73.21	73.57	60.24	60.71	87.33	85	93.87	83.15	115.1	116	99.56	117.5		78.75	99.69	70.43	77.42	108.8	111.4	86.02	93.41	79.12	67.52	76.6	54.39		91.94	89.63	98.38	118.5	85.4	105.7	119.2	132.5
Cr	80	110	82	16.1	61	91.4	Cr	50.22	78.5	78.3	87.94	80	74.29	494.3	79.56	76.19	108.7	89.28	91.26	119.1	114.2	114.4	174.1	341.2	64.23	67.89	77.08		72.48	87.48	59.97	62.74	96.93	86.45	83.56	79.88	77.48	71.51	97.32	53.1		72.83	73.44	79.52	92.81	65.74	131.7	81.52	85.81
Mn	7047.56	600	810	648.4	600	578.8	Mn	787.4	2440.9	1841.7	2482.2	1295.6	1450.7	1297.4	1566.6	1595.5	1356.3	1056	1328.9	1821.9	1804.7	1897.2	1731.7	2483.5	2602	2266.5	2251.9		1390.7	1613.4	1480	1377.2	2082.2	1768	1600.9	1808.7	1529.6	1215.2	1344.7	1234.4		1891.7	1937.3	2468	2049.7	1664.9	2117.2	2804.7	3354.5
Co	17	23	17	5.44	12.7	20.3	Co	9.71	18.6	16.55	18.72	11.97	13.77	23.75	13.94	14.98	15.05	13.87	12.08	16.44	15.76	17.08	18.12	26.56	18.3	16.65	20.01		14.31	18.66	13.56	13.83	19.79	20.38	16.72	17.82	14.9	13.94	15.03	10.91		17.71	16.64	18.03	16.93	16.19	18.92	19.7	20.72
Ni	38	55	33	8.98	26.9	48.5	Ni	96.89	124.8	120	127.6	304.7	107.9	7699.5	426.1	306.8	696.6	588.3	620.1	819.3	710.1	793.4	1962.5	4680.9	51.48	44.28	53.15		34.84	41.76	31.94	50.17	133	145.3	113.7	118.9	107	31.07	35.51	23.67		43.97	43.87	44.9	43.65	40.15	737.9	54.76	61.27
Cu	32	25	35	58.4	22.6	31.5	Cu	28.12	56.18	53.28	54.51	40.33	38.8	60.39	43.47	42.37	41.63	38.6	35.86	47.73	45.34	56.96	61.21	72.26	54.52	64.78	67.83		47.36	53.51	44.9	47.29	60.47	57.19	48.54	53.38	45.54	43.8	45.82	30.99		50.63	51.98	53.03	54.4	48.28	56.58	58.26	64.3
Zn	70	71	78	63.81	74.2	113.8	Zn	160.3	260	264.9	262.3	195.2	210.2	187	200.6	226.8	224.4	186.6	178.4	220.8	211.7	240.6	228.3	265.6	267	284.5	318.7		207.5	276.2	203.5	207.4	316.4	326	285.5	270.5	240.6	1080.8	287.7	210.4		252	228.9	279.8	255.1	238.4	244.6	244.5	255.5
Pb	18	20	27	45.84	26	38.69	Pb	48.55	91.09	79.23	89.39	60.66	61.82	54.16	59.99	64.85	66.59	51.96	57.78	71.1	68.95	76.17	73.85	88.7	96.52	92.53	111		72.41	75.44	57.88	64.43	89.67	87.86	72.34	75.62	66.38	162.2	78.87	61.39		76.01	74.25	88.98	86.95	75.79	78.4	83.22	93.14
Th	8.95	14.6	12.4	31.58	13.75	25.2	Th	12.92	25.41	20.96	23.45	22.21	45.15	24.78	20.56	21.02	31.35	14.13	18.15	29.17	26.01	18.66	18.93	22.79	29.85	22.23	28.31		26.7	21.74	22.75	25.24	21.07	26	24.26	21.09	24.4	21.25	29.43	24.6		20.16	20.78	21.75	22.61	18.66	20.61	24.47	26.21
U	1.55	3.1	2.6	12.6	3.03	6.72	U	3.944	6.195	4.889	5.777	5.743	8.461	6.128	5.369	5.552	6.054	3.875	5.756	5.801	5.467	4.71	4.992	5.707	6.329	5.338	6.829		5.436	5.181	4.881	6.511	5.29	5.408	5.709	5.647	5.388	4.931	5.274	5.166		4.902	4.703	5.527	5.128	4.502	4.763	5.97	6.412
Cd	0.098	0.3	0.25	0.01	0.09	1.03	Cd	1.814	3.88	3.973	3.695	2.394	2.92	2.199	2.876	2.97	2.942	2.356	2.274	2.925	2.836	3.537	3.415	4.081	3.806	4.114	4.856		2.695	3.52	2.616	2.687	4.667	4.569	3.545	3.423	3.186	25.9	4.055	2.546		3.614	3.092	3.945	3.343	3.396	3.521	3.221	3.219
Tl		1	0.49	/	0.6	0.6	Tl	0.843	1.159	1.091	1.172	0.812	0.933	0.84	0.936	1.02	1.093	1.023	0.861	1.002	0.979	1.031	1.037	1.163	1.309	1.151	1.413		0.997	1.045	0.891	0.986	1.133	1.16	1.061	1.055	1.005	1.27	0.997	0.823		1.102	1.071	1.18	1.113	1.108	1.101	1.163	1.262
Other trace elements							Other trace elements
Cs	3.55	6	7.3	21.87	8.24	17.27	Cs	11.55	20.64	19.95	21.65	13.23	15.62	13.1	15.42	17.05	17.66	14.67	14.07	17.83	17.72	19.02	18.34	21.19	19.6	21.32	21.02		16.54	18.18	14.6	15.84	20.92	21.65	16.8	18.06	16.26	17.39	17.22	12.6		19.51	18.94	21.99	20.28	19.39	20.09	21.66	23.63
Ga	18	17	16	19	17.5	20.72	Ga	10.99	20.6	19.23	21.14	12.83	14.63	12.26	14.37	15.53	16.45	13.28	13.01	17.83	17.14	18.31	17.55	21.06	22.5	20.18	24.07		15.87	18.77	14.66	15.99	20.68	21.59	16.78	18.05	16.11	16.11	16.52	12.18		19.22	18.42	20.59	21.66	18.11	19.63	22.22	23.84
Ge	1.34	1.6	1.3	1.2	1.7	2.53	Ge	1.874	2.729	2.687	3.022	2.411	2.416	2.171	2.237	2.37	2.434	2.02	2.288	2.75	2.533	2.646	2.304	2.799	2.859	2.581	3.073		2.548	2.71	2.365	2.501	2.744	2.768	2.504	2.486	2.363	2.156	2.391	2.295		2.564	2.609	2.688	3.046	2.414	2.792	2.876	3.24
Rb	82	160	100	261.3	111	160.98	Rb	135.6	181.1	170.2	183.9	134.1	156.6	135.1	157	174.7	183.2	154.5	144.8	163	161.8	170.3	167.4	189	165.5	184.7	172.3		155.2	154.8	144.7	150.8	175.6	171.5	151.5	161.6	144.7	218	154.6	136.1		174.3	173.4	184.1	166.3	171.9	178.8	187.4	197.5
Sr	266	200	150	118.7	167	57.2	Sr	40.87	56.45	53.62	58.8	44.38	45.65	40.02	46.57	47.35	48.68	46.72	43.92	50.6	49.99	54.57	55.03	59.81	58.58	57.79	62.46		51.64	57.73	50.81	47.14	61.57	63.12	51.37	56.67	52.14	47.5	50.01	40.26		54.37	52.98	58.04	55.38	53.13	56.2	58.44	61.32
Zr	188	210	246	164.5	256	315.2	Zr	435	334.6	300	371.6	868.9	788.2	789.9	808.7	629.6	619.5	329.7	824.2	446.1	458.9	298.6	343.3	250.1	248.2	317.3	300.8		549.1	442.5	557.3	653.6	311.2	334.6	519.3	377.9	556.8	603.2	531.3	754.2		285.7	290.1	251.7		327.3	276.5	258.4	225.3
Hf	5.12	5	8.1	5.44	7.72	9.23	Hf	11.99	10.19	8.383	10.59	23.86	22.31	22.96	22.09	17.33	16.74	9.621	22.25	12.39	13.24	7.816	9.835	7.275	7.998	8.853	9.676		15.15	12.74	15.9	19.34	9.024	9.007	15.32	10.78	15.84	16.17	14.35	21.3		8.264	8.343	7.556	8.225	8.785	7.562	7.547	6.842
Nb	12	19	19	26.37	16	19.12	Nb	13.61	17.2	16.4	17.97	17.6	16.12	14.72	17.44	18.66	16.39	12.53	14.78	21.71	16.72	16.03	15.77	17.43	16.99	17.32	17.86		18.9	16.38	14.56	18.09	16.89	16.94	15.88	15.91	16.2	18.56	16.25	13.29		15.78	15.69	16.53	18.05	15.38	16.42	18.25	19.36
Ta	0.74	1.2	0.3	5.01	1.2	2.16	Ta	1.439	2.121	1.837	1.928	2.063	2.104	1.655	2.149	2.649	1.856	1.528	1.71	1.858	2.09	2.201	2.057	2.075	2.044	2.198	2.341		1.952	1.887	1.767	1.828	1.874	1.852	1.875	1.791	1.89	2.384	1.942	1.604		1.776	1.81	1.885	1.95	1.777	1.727	2.129	2.146
La	30	32	41.6	51.97	38	55.12	La	33.07	56.23	45.34	55.5	53.79	48.01	41.51	47.66	48.18	55.42	32.77	44.34	53.85	50.38	43.87	42.86	54.27	65.21	51.21	66.32		56.03	52.83	49.11	53.37	53.33	49.01	55.8	49.2	46.24	47.15	53.81	57.62		51.42	50.17	53.52	49	45.74	49.52	56.82	60.52
Ce	64	73	87.6	96.81	72	110.4	Ce	64.15	107.6	86.95	105.1	107.7	96.09	79.91	94.88	90.95	106.7	66.98	85.36	105.1	95.93	83.97	82.14	106.5	121.4	99.28	125		112.4	103	96.82	105.7	102.5	96.75	107.4	94.93	89.55	96.27	105.7	114.6		98.58	96.67	100.9	91.91	88.33	95.78	110.4	116.1
Pr	7.1	7.9	9.9	11.27	8.2	12.77	Pr	7.539	12.46	10.09	12.46	12.73	11.22	9.52	11	11.04	12.42	7.689	9.733	12.4	11.06	10.08	10.09	12.62	14.25	11.17	14.31		13.06	11.52	11.13	12.54	11.91	11.4	12.04	11.03	10.31	11.35	12.13	13.3		11.55	11.36	11.52	10.53	10.14	11.11	12.69	13.31
Nd	26	33	36.8	38.68	32	47.09	Nd	28.21	45.58	38.2	46.68	47.03	41.23	35.33	40.53	40.79	46.44	27.99	36.32	45.96	40.83	38.19	36.91	46.83	54.07	42.31	54.22		48.66	42.77	41.23	46.22	43.08	43.97	44.09	41.78	38.35	42.53	45.78	48.63		42.57	41.08	42.69	38.4	37.68	41	46.38	49.29
Sm	4.5	5.7	7.38	7.81	5.8	8.7	Sm	5.142	8.748	7.173	8.984	8.83	7.784	6.654	7.655	7.661	8.563	5.409	6.623	9.306	7.9	7.398	7.115	8.561	10.2	8.052	10.16		8.998	7.992	7.695	8.97	7.927	8.595	8.105	7.879	7.333	8.107	8.591	9.001		7.728	7.614	7.857	7.548	7.47	7.705	8.719	9.579
Eu	0.88	1.24	1.47	0.74	1.2	1.44	Eu	0.8	1.42	1.262	1.496	1.155	1.032	1.01	1.113	1.124	1.076	0.837	0.979	1.377	1.2	1.235	1.192	1.461	1.689	1.3	1.752		1.173	1.303	1.072	1.271	1.294	1.389	1.26	1.307	1.188	0.965	1.174	1.028		1.352	1.244	1.371	1.373	1.176	1.303	1.497	1.626
Gd	3.8	5.2	6.16	7.18	5.1	7.77	Gd	4.462	7.929	6.708	8.402	7.215	7.212	5.735	6.446	6.88	7.885	4.763	6.075	9.419	7.268	6.65	6.333	7.569	9.63	7.258	9.286		7.592	7.228	6.607	8.277	6.897	7.236	7.213	7.065	7	6.44	7.573	7.59		6.988	7.015	7.413	7.036	6.946	6.782	8.277	8.818
Tb	0.64	0.85	0.94	1.22	0.8	1.26	Tb	0.739	1.304	1.064	1.318	1.101	1.232	0.933	1.014	1.134	1.248	0.8	0.982	1.49	1.163	1.042	1.053	1.21	1.509	1.132	1.443		1.167	1.105	1.047	1.338	1.102	1.102	1.128	1.187	1.117	0.97	1.131	1.114		1.12	1.118	1.197	1.153	1.177	1.102	1.34	1.418
Dy	3.5	5.8	5.47	7.33	4.7	7.38	Dy	4.527	7.634	6.156	7.469	6.282	7.46	5.234	5.777	6.775	7.331	4.635	5.699	8.127	6.549	6.172	6.185	6.798	8.396	6.276	7.952		6.676	6.376	5.999	7.842	6.19	6.272	6.388	7.002	6.343	5.316	6.359	5.777		6.469	6.223	6.934	6.757	7.378	6.391	7.701	7.955
Y	17.4	27	28	41.7	23	39.39	Y	26.18	40.14	36.42	42.42	38.46	44.71	29.1	32.7	38.58	46.19	25.75	34.84	43.4	36.05	37.45	36.11	37.82	42.01	35.97	40.92		38.32	33.15	33.53	41.76	33.96	37.77	33.49	40.98	35.93	29.63	35.79	29.32		35.13	34.27	37.69	38.24	47.12	35.99	42.2	43.98
Ho	0.8	1.04	1.1	1.47	1	1.51	Ho	0.918	1.493	1.249	1.445	1.324	1.568	1.088	1.202	1.427	1.58	0.961	1.193	1.613	1.291	1.261	1.285	1.401	1.675	1.267	1.596		1.369	1.256	1.223	1.589	1.257	1.322	1.274	1.44	1.289	1.06	1.26	1.098		1.307	1.274	1.395	1.352	1.623	1.323	1.549	1.562
Er	2.3	3.4	3.15	4.16	2.8	4.22	Er	2.802	4.218	3.598	4.294	4.03	4.495	3.26	3.572	4.098	4.642	2.764	3.655	4.524	3.674	3.71	3.675	3.908	4.707	3.669	4.526		3.999	3.561	3.519	4.541	3.555	3.78	3.59	4.295	3.703	3.087	3.6	3.172		3.743	3.574	3.937	3.849	4.801	3.727	4.323	4.489
Tm	0.33	0.5	0.44	0.67	0.42	0.63	Tm	0.447	0.653	0.555	0.645	0.647	0.715	0.523	0.56	0.63	0.725	0.428	0.594	0.686	0.566	0.567	0.573	0.572	0.716	0.56	0.699		0.615	0.532	0.542	0.698	0.533	0.589	0.55	0.641	0.588	0.492	0.557	0.482		0.55	0.532	0.601	0.595	0.754	0.551	0.642	0.678
Yb	2.2	3.1	2.88	4.38	2.6	4.11	Yb	3.024	4.291	3.662	4.263	4.418	4.907	3.648	3.885	4.161	4.74	2.731	4.115	4.501	3.84	3.749	3.821	3.664	4.639	3.676	4.522		4.138	3.552	3.526	4.7	3.486	3.768	3.698	4.151	3.916	3.228	3.659	3.341		3.541	3.35	3.985	3.892	4.92	3.569	4.142	4.36
Lu	0.32	0.48	0.42	0.65	0.4	0.63	Lu	0.478	0.671	0.568	0.654	0.706	0.754	0.604	0.622	0.654	0.724	0.424	0.671	0.686	0.591	0.569	0.576	0.557	0.703	0.559	0.698		0.633	0.553	0.543	0.75	0.541	0.58	0.592	0.635	0.622	0.511	0.56	0.545		0.552	0.526	0.611	0.592	0.723	0.541	0.633	0.68
REE	163.77	200.21	233.31	276.04	198.02	302.42	REE	182.488	300.371	248.995	301.13	295.418	278.419	224.059	258.616	264.084	305.684	184.931	241.179	302.439	268.292	245.913	239.918	293.741	340.804	273.689	343.404		304.83	276.728	263.593	299.566	277.562	273.533	286.618	273.522	253.479	257.106	287.674	296.618		272.6	266.02	281.621	262.227	265.978	266.394	307.313	324.365
Ni/Co	2.23529	2.3913	1.94118	1.65074	2.11811	2.38916	Ni/Co	9.97837	6.70968	7.25076	6.81624	25.4553	7.83588	324.189	30.5667	20.4806	46.2857	42.4153	51.3328	49.8358	45.0571	46.452	108.306	176.239	2.81311	2.65946	2.65617		2.43466	2.23794	2.35546	3.62762	6.72057	7.12954	6.80024	6.67228	7.18121	2.22884	2.36261	2.16957		2.48278	2.63642	2.49029	2.57826	2.47993	39.0011	2.7797	2.95705
Ni/Cr	0.475	0.5	0.402439	0.557764	0.440984	0.530635	Ni/Cr	1.92931	1.58981	1.53257	1.45099	3.80875	1.45242	15.5766	5.35571	4.02678	6.40846	6.58938	6.79487	6.87909	6.21804	6.93531	11.2723	13.7189	0.801495	0.652232	0.689543		0.480684	0.477366	0.5326	0.799649	1.37212	1.68074	1.3607	1.48848	1.381	0.434485	0.364879	0.445763		0.603735	0.597358	0.564638	0.470316	0.610739	5.60289	0.671737	0.714019
Zn/Cd	714.286	236.667	312	6381	824.444	110.485	Zn/Cd	88.3682	67.0103	66.6751	70.9878	81.5372	71.9863	85.0387	69.7497	76.3636	76.2746	79.202	78.4521	75.4872	74.6474	68.0237	66.8521	65.0821	70.1524	69.1541	65.6301		76.9944	78.4659	77.7905	77.1865	67.7952	71.3504	80.536	79.0242	75.5179	41.7297	70.9494	82.6394		69.7288	74.0298	70.9252	76.3087	70.2002	69.4689	75.9081	79.3725
Cr/Sc	5.33333	7.33333	6.30769	3.17554	5.4955	6.19241	Cr/Sc	6.32175	5.9067	6.49254	6.38171	8.67209	7.30482	59.4396	7.84615	7.30489	10.2354	9.87174	10.1898	10.232	10.1511	9.67033	15.3392	24.671	4.64425	5.3881	5.25784		6.45989	6.4182	5.6257	5.63702	6.81167	5.62459	7.0634	6.23089	6.74913	6.84962	8.55937	6.25663		5.69429	6.08451	6.01968	6.48567	5.51048	9.82836	5.62207	5.52188
Zr/Hf	36.7188	42	30.3704	30.239	33.1606	34.1495	Zr/Hf	36.2802	32.8361	35.7867	35.0897	36.4166	35.3294	34.4033	36.6093	36.3301	37.0072	34.2688	37.0427	36.0048	34.6601	38.2037	34.9059	34.378	31.0328	35.841	31.0872		36.2442	34.7331	35.0503	33.7952	34.4858	37.1489	33.8969	35.0557	35.1515	37.3036	37.0244	35.4085		34.5716	34.7717	33.3113	0	37.2567	36.5644	34.2388	32.929
Nb/Ta	16.2162	15.8333	63.3333	5.26347	13.3333	8.85185	Nb/Ta	9.45796	8.10938	8.9276	9.32054	8.53127	7.6616	8.89426	8.1154	7.04417	8.83082	8.20026	8.64327	11.6846	8	7.28305	7.6665	8.4	8.31213	7.87989	7.62922		9.68238	8.68045	8.23995	9.89606	9.01281	9.14687	8.46933	8.88331	8.57143	7.78523	8.36766	8.28554		8.88514	8.66851	8.76923	9.25641	8.65504	9.50782	8.5721	9.02144
Ga/Ge	13.4328	10.625	12.3077	15.8333	10.2941	8.18972	Ga/Ge	5.86446	7.54855	7.15668	6.99537	5.32144	6.05546	5.64717	6.42378	6.55274	6.75842	6.57426	5.68619	6.48364	6.76668	6.91988	7.61719	7.52412	7.86988	7.81867	7.83274		6.22841	6.9262	6.19873	6.39344	7.53644	7.79986	6.70128	7.26066	6.8176	7.47217	6.90924	5.30719		7.4961	7.06018	7.65997	7.11097	7.50207	7.0308	7.72601	7.35802
Rb/Sr	0.308271	0.8	0.666667	2.20135	0.664671	2.81434	Rb/Sr	3.31784	3.20815	3.17419	3.12755	3.02163	3.43045	3.37581	3.37127	3.68955	3.76335	3.30693	3.2969	3.22134	3.23665	3.12076	3.04198	3.16001	2.8252	3.19605	2.75857		3.00542	2.68145	2.84786	3.19898	2.85204	2.71705	2.94919	2.8516	2.77522	4.58947	3.09138	3.38053		3.20581	3.27293	3.17195	3.00289	3.23546	3.18149	3.20671	3.22081
Rb/Cs	23.0986	26.6667	13.6986	11.9479	13.4709	9.32137	Rb/Cs	11.7403	8.77422	8.53133	8.49423	10.1361	10.0256	10.313	10.1816	10.2463	10.3737	10.5317	10.2914	9.1419	9.13093	8.95373	9.12759	8.9193	8.44388	8.66323	8.19696		9.38331	8.51485	9.91096	9.5202	8.39388	7.92148	9.01786	8.94795	8.89914	12.5359	8.97793	10.8016		8.93388	9.15523	8.37199	8.2002	8.86539	8.89995	8.65189	8.35802
Nd/Sm	5.77778	5.78947	4.98645	4.95262	5.51724	5.41264	Nd/Sm	5.48619	5.21033	5.32553	5.1959	5.32616	5.29676	5.30959	5.29458	5.32437	5.42333	5.17471	5.48392	4.93875	5.16835	5.16221	5.18763	5.47016	5.30098	5.2546	5.33661		5.40787	5.3516	5.35802	5.15273	5.43459	5.11576	5.43985	5.3027	5.22978	5.24608	5.32883	5.40273		5.50854	5.39532	5.43337	5.08744	5.04418	5.32122	5.31942	5.14563
	*CV 为变异系数;CIA=100 × Al2O3 /(Al2O3＋CaO*＋Na2O＋K2O);ICV=100 × (Fe2O3＋K2O＋Na2O＋CaO＋MgO＋MnO＋TiO2) / Al2O3;WIP=100×[(2Na2O/0.35)＋(MgO/0.9)＋(2K2O/0.25)＋(CaO*/0.7)
	a is the East China upper crust (Gao et al. 1999), b is the North American Shale composit(Gromet et al,1984),c for Yangtze River sediments (Yan et al. 1997), d reflects Hunan granitic rocks (statistic results from publisheddata of 171 samples),
	e is the Palaeozoic sandstones ( n=22 , Bai et al. 2007) ,f for the Chinese soil (Yan et al. 1997), g is the Xiang jiang river sediment( XJR,n=344,Fang et al., 2021)
	h DT represents sediments of the Dongting Lake watershed, and its background values are summarized from reports (Peng et al., 2011)
NASC-normalization
Sample ID(mass%)	UCCa	NASCb	YZc	HGRd	CASf	XJRg	Sample ID(mass%)	YP1	YP2	YP5	YP6	YP7	YP8	YP9	YP10	YP11	YP12	YP13	YP14	YP15	YP16	YP17	YP18	YP19	YP20	YP21	YP22		FY1	FY2	FY3	FY4	FY5	FY6	FY7	FY8	FY9	SC1	SC2	SC3		SW1	SW2	SW3	SW4	SW5	SW6	SW7	SW8
La							La	1.03344	1.75719	1.41688	1.73438	1.68094	1.50031	1.29719	1.48937	1.50562	1.73188	1.02406	1.38563	1.68281	1.57438	1.37094	1.33937	1.69594	2.03781	1.60031	2.0725		1.75094	1.65094	1.53469	1.66781	1.66656	1.53156	1.74375	1.5375	1.445	1.47344	1.68156	1.80062		1.60688	1.56781	1.6725	1.53125	1.42938	1.5475	1.77563	1.89125
Ce							Ce	0.878767	1.47397	1.1911	1.43973	1.47534	1.3163	1.09466	1.29973	1.24589	1.46164	0.917534	1.16932	1.43973	1.31411	1.15027	1.12521	1.4589	1.66301	1.36	1.71233		1.53973	1.41096	1.3263	1.44795	1.40411	1.32534	1.47123	1.30041	1.22671	1.31877	1.44795	1.56986		1.35041	1.32425	1.38219	1.25904	1.21	1.31205	1.51233	1.59041
Pr							Pr	0.954304	1.57722	1.27722	1.57722	1.61139	1.42025	1.20506	1.39241	1.39747	1.57215	0.973291	1.23203	1.56962	1.4	1.27595	1.27722	1.59747	1.8038	1.41392	1.81139		1.65316	1.45823	1.40886	1.58734	1.50759	1.44304	1.52405	1.3962	1.30506	1.43671	1.53544	1.68354		1.46203	1.43797	1.45823	1.33291	1.28354	1.40633	1.60633	1.68481
Nd							Nd	0.854848	1.38121	1.15758	1.41455	1.42515	1.24939	1.07061	1.22818	1.23606	1.40727	0.848182	1.10061	1.39273	1.23727	1.15727	1.11848	1.41909	1.63848	1.28212	1.64303		1.47455	1.29606	1.24939	1.40061	1.30545	1.33242	1.33606	1.26606	1.16212	1.28879	1.38727	1.47364		1.29	1.24485	1.29364	1.16364	1.14182	1.24242	1.40545	1.49364
Sm							Sm	0.902105	1.53474	1.25842	1.57614	1.54912	1.36561	1.16737	1.34298	1.34404	1.50228	0.948947	1.16193	1.63263	1.38596	1.29789	1.24825	1.50193	1.78947	1.41263	1.78246		1.5786	1.40211	1.35	1.57368	1.3907	1.50789	1.42193	1.38228	1.28649	1.42228	1.50719	1.57912		1.35579	1.33579	1.37842	1.32421	1.31053	1.35175	1.52965	1.68053
Eu							Eu	0.645161	1.14516	1.01774	1.20645	0.931452	0.832258	0.814516	0.897581	0.906452	0.867742	0.675	0.789516	1.11048	0.967742	0.995968	0.96129	1.17823	1.3621	1.04839	1.4129		0.945968	1.05081	0.864516	1.025	1.04355	1.12016	1.01613	1.05403	0.958065	0.778226	0.946774	0.829032		1.09032	1.00323	1.10565	1.10726	0.948387	1.05081	1.20726	1.31129
Gd							Gd	0.858077	1.52481	1.29	1.61577	1.3875	1.38692	1.10288	1.23962	1.32308	1.51635	0.915962	1.16827	1.81135	1.39769	1.27885	1.21788	1.45558	1.85192	1.39577	1.78577		1.46	1.39	1.27058	1.59173	1.32635	1.39154	1.38712	1.35865	1.34615	1.23846	1.45635	1.45962		1.34385	1.34904	1.42558	1.35308	1.33577	1.30423	1.59173	1.69577
Tb							Tb	0.869412	1.53412	1.25176	1.55059	1.29529	1.44941	1.09765	1.19294	1.33412	1.46824	0.941176	1.15529	1.75294	1.36824	1.22588	1.23882	1.42353	1.77529	1.33176	1.69765		1.37294	1.3	1.23176	1.57412	1.29647	1.29647	1.32706	1.39647	1.31412	1.14118	1.33059	1.31059		1.31765	1.31529	1.40824	1.35647	1.38471	1.29647	1.57647	1.66824
Dy							Dy	0.780517	1.31621	1.06138	1.28776	1.0831	1.28621	0.902414	0.996034	1.1681	1.26397	0.799138	0.982586	1.40121	1.12914	1.06414	1.06638	1.17207	1.44759	1.08207	1.37103		1.15103	1.09931	1.03431	1.35207	1.06724	1.08138	1.10138	1.20724	1.09362	0.916552	1.09638	0.996034		1.11534	1.07293	1.19552	1.165	1.27207	1.1019	1.32776	1.37155
Y							Y	0.96963	1.48667	1.34889	1.57111	1.42444	1.65593	1.07778	1.21111	1.42889	1.71074	0.953704	1.29037	1.60741	1.33519	1.38704	1.33741	1.40074	1.55593	1.33222	1.51556		1.41926	1.22778	1.24185	1.54667	1.25778	1.39889	1.24037	1.51778	1.33074	1.09741	1.32556	1.08593		1.30111	1.26926	1.39593	1.4163	1.74519	1.33296	1.56296	1.62889
Ho							Ho	0.882692	1.43558	1.20096	1.38942	1.27308	1.50769	1.04615	1.15577	1.37212	1.51923	0.924038	1.14712	1.55096	1.24135	1.2125	1.23558	1.34712	1.61058	1.21827	1.53462		1.31635	1.20769	1.17596	1.52788	1.20865	1.27115	1.225	1.38462	1.23942	1.01923	1.21154	1.05577		1.25673	1.225	1.34135	1.3	1.56058	1.27212	1.48942	1.50192
Er							Er	0.824118	1.24059	1.05824	1.26294	1.18529	1.32206	0.958824	1.05059	1.20529	1.36529	0.812941	1.075	1.33059	1.08059	1.09118	1.08088	1.14941	1.38441	1.07912	1.33118		1.17618	1.04735	1.035	1.33559	1.04559	1.11176	1.05588	1.26324	1.08912	0.907941	1.05882	0.932941		1.10088	1.05118	1.15794	1.13206	1.41206	1.09618	1.27147	1.32029
Tm							Tm	0.894	1.306	1.11	1.29	1.294	1.43	1.046	1.12	1.26	1.45	0.856	1.188	1.372	1.132	1.134	1.146	1.144	1.432	1.12	1.398		1.23	1.064	1.084	1.396	1.066	1.178	1.1	1.282	1.176	0.984	1.114	0.964		1.1	1.064	1.202	1.19	1.508	1.102	1.284	1.356
Yb							Yb	0.975484	1.38419	1.18129	1.37516	1.42516	1.5829	1.17677	1.25323	1.34226	1.52903	0.880968	1.32742	1.45194	1.23871	1.20935	1.23258	1.18194	1.49645	1.18581	1.45871		1.33484	1.14581	1.13742	1.51613	1.12452	1.21548	1.1929	1.33903	1.26323	1.04129	1.18032	1.07774		1.14226	1.08065	1.28548	1.25548	1.5871	1.15129	1.33613	1.40645
Lu							Lu	0.995833	1.39792	1.18333	1.3625	1.47083	1.57083	1.25833	1.29583	1.3625	1.50833	0.883333	1.39792	1.42917	1.23125	1.18542	1.2	1.16042	1.46458	1.16458	1.45417		1.31875	1.15208	1.13125	1.5625	1.12708	1.20833	1.23333	1.32292	1.29583	1.06458	1.16667	1.13542		1.15	1.09583	1.27292	1.23333	1.50625	1.12708	1.31875	1.41667
							(La/Yb)N	1.05941	1.26947	1.19943	1.26122	1.17947	0.947823	1.10232	1.18843	1.12171	1.13266	1.16243	1.04385	1.15901	1.27098	1.13361	1.08664	1.43488	1.36176	1.34956	1.42078		1.31172	1.44085	1.34927	1.10005	1.48203	1.26004	1.46177	1.14822	1.1439	1.41501	1.42466	1.67074		1.40675	1.45081	1.30107	1.21965	0.900622	1.34414	1.32893	1.3447
							(La/Sm)N	1.14558	1.14494	1.12591	1.10039	1.08509	1.09864	1.11121	1.10901	1.12023	1.15283	1.07916	1.19252	1.03074	1.13594	1.05628	1.07301	1.12917	1.13878	1.13286	1.16272		1.10917	1.17747	1.13681	1.05981	1.19836	1.0157	1.22633	1.11229	1.12321	1.03597	1.11569	1.14027		1.1852	1.1737	1.21334	1.15635	1.09069	1.14481	1.16081	1.12539
							(Gd/Yb)N	0.879642	1.10159	1.09203	1.17497	0.973574	0.876189	0.93721	0.98914	0.98571	0.991703	1.03972	0.880106	1.24754	1.12835	1.05746	0.988077	1.23152	1.23754	1.17706	1.22421		1.09377	1.21312	1.11707	1.04986	1.17948	1.14484	1.16281	1.01465	1.06565	1.18935	1.23385	1.35433		1.17648	1.24836	1.10898	1.07773	0.841643	1.13284	1.1913	1.20571
							(Eu/Eu)N	0.72383	0.746261	0.810159	0.769564	0.635647	0.597343	0.711765	0.693933	0.676072	0.581969	0.713242	0.68077	0.664032	0.701204	0.781684	0.772036	0.798225	0.763167	0.756442	0.805317		0.626166	0.767903	0.659441	0.651279	0.767538	0.778904	0.730701	0.759957	0.739471	0.585345	0.653437	0.556208		0.811734	0.754858	0.796425	0.829496	0.710399	0.788	0.781346	0.782173
							Ce/Ce*	0.90231	0.903246	0.895263	0.88448	0.924588	0.92915	0.896041	0.926846	0.880009	0.900208	0.950384	0.906011	0.907705	0.898839	0.88502	0.888967	0.909737	0.873109	0.910156	0.887519		0.928213	0.920604	0.921305	0.91715	0.908107	0.904558	0.915029	0.898682	0.9082	0.934045	0.914415	0.928019		0.899524	0.90692	0.893921	0.893753	0.907371	0.907489	0.915323	0.904304
							Eu/Eu*	-0.140364	-0.127109	-0.0914296	-0.113755	-0.196784	-0.223776	-0.147663	-0.158682	-0.170007	-0.2351	-0.146763	-0.167	-0.177811	-0.154155	-0.106969	-0.112362	-0.0978748	-0.11738	-0.121224	-0.0940333		-0.203311	-0.114694	-0.180824	-0.186233	-0.1149	-0.108516	-0.13626	-0.119211	-0.131079	-0.232588	-0.184796	-0.254762		-0.0905865	-0.122135	-0.098855	-0.0811857	-0.148497	-0.103474	-0.107157	-0.106697
							V-shape Eu/Eu*	#REF!
							Flate-shale Eu/Eu*	#REF!
EF-XJR							EF-XJR
Heavy metals							Heavy metals
Ba							Ba	1.27316	0.922893	1.02398	0.998491	0.988628	1.21758	1.17691	1.18151	1.05561	1.09673	1.02093	1.1961	1.10874	1.05106	1.0034	1.03836	0.962018	0.969497	1.07636	0.932721		1.06333	0.904552	1.12865	0.986685	0.962768	0.922532	1.00108	0.980122	1.02315	1.16108	0.947776	1.13944		0.897874	0.898381	0.977303	0.867943	0.943503	0.876634	0.924179	0.935072
Sc							Sc	0.982379	0.902151	0.952547	0.969098	0.845372	1.1232	0.951167	1.01234	0.945759	0.948156	0.935052	1.0219	0.992393	0.948558	0.949153	0.955814	0.925995	0.936764	0.952123	0.92967		0.998386	1.01944	1.00707	0.979222	0.969665	1.0333	0.992479	0.984753	1.00153	0.893861	0.974158	0.981333		0.912998	0.913365	0.939036	0.999125	0.943304	0.93735	0.922124	0.931895
V							V	0.809832	1.03124	0.992033	1.12615	0.794841	1.08572	0.914505	0.965613	0.924373	0.914611	0.867243	0.964572	1.03675	0.997955	1.04872	0.975035	1.07311	1.09407	1.04758	1.03756		0.975745	1.03824	0.92649	0.948461	1.03235	1.04284	1.00489	0.999109	0.96114	0.804975	0.913857	0.875713		0.91387	0.944433	0.973793	1.15207	0.940264	1.02956	1.05555	1.1064
Cr							Cr	1.0029	0.860526	0.998714	0.998723	1.18389	1.32497	9.13005	1.28269	1.11567	1.5672	1.49063	1.68157	1.63977	1.55495	1.48224	2.36764	3.68923	0.702564	0.828454	0.789363		1.04151	1.05661	0.914907	0.891396	1.06663	0.938549	1.13208	0.990872	1.09157	0.988727	1.34652	0.991509		0.839556	0.897449	0.912843	1.04644	0.839424	1.48773	0.837193	0.830987
Mn							Mn	2.48309	4.22534	3.70951	4.45157	3.02768	4.08573	3.7842	3.98844	3.68936	3.08794	2.78418	3.86673	3.96108	3.88038	3.8817	3.71884	4.24042	4.49441	4.36753	3.64168		3.15571	3.07727	3.56551	3.08987	3.61824	3.03104	3.42498	3.54294	3.40295	2.65323	2.938	3.63979		3.44357	3.73845	4.47386	3.64946	3.35705	3.77674	4.54847	5.12981
Co							Co	0.87307	0.918031	0.950446	0.957226	0.797565	1.10575	1.97513	1.01191	0.98764	0.976972	1.04266	1.00219	1.01911	0.96618	0.996391	1.1095	1.29302	0.901259	0.914802	0.92264		0.925839	1.01477	0.931435	0.884705	0.980512	0.996199	1.01991	0.995261	0.945141	0.867806	0.936307	0.917228		0.919196	0.915547	0.931892	0.859463	0.930783	0.962296	0.910915	0.903433
Ni							Ni	3.64639	2.57818	2.88446	2.73095	8.49764	3.62661	268.009	12.9462	8.46635	18.9271	18.5105	21.5328	21.2578	18.2211	19.3726	50.2958	95.3807	1.06119	1.0183	1.02575		0.94347	0.950542	0.918295	1.3433	2.75812	2.97277	2.90296	2.77949	2.84085	0.809572	0.925901	0.832923		0.955213	1.0103	0.971338	0.927489	0.966143	15.7087	1.05981	1.11817
Cu							Cu	1.62941	1.78695	1.97187	1.79626	1.73175	2.0079	3.23656	2.03354	1.80024	1.74156	1.86999	1.91726	1.90677	1.7913	2.1414	2.41533	2.26705	1.73037	2.29371	2.01554		1.97466	1.87533	1.98758	1.94953	1.93078	1.80156	1.90815	1.92129	1.86161	1.75719	1.8395	1.67903		1.69349	1.8431	1.76635	1.77973	1.78877	1.85454	1.73607	1.80677
Zn							Zn	2.57109	2.28914	2.71372	2.39255	2.32009	3.011	2.77414	2.59754	2.66737	2.5985	2.50225	2.64018	2.4416	2.31514	2.50375	2.4936	2.30653	2.34565	2.78836	2.62132		2.39479	2.67938	2.49351	2.36668	2.79639	2.84258	3.10661	2.69495	2.72245	12.0021	3.19708	3.15538		2.33316	2.24661	2.57971	2.31012	2.4449	2.21921	2.01671	1.98724
Pb							Pb	2.29043	2.35892	2.38735	2.39825	2.12066	2.60466	2.36324	2.28483	2.24333	2.26805	2.04943	2.51512	2.31253	2.21786	2.33143	2.37255	2.26568	2.49409	2.66743	2.68538		2.45806	2.15256	2.08602	2.16253	2.33105	2.25336	2.31528	2.21597	2.20925	5.29795	2.57791	2.70799		2.06994	2.14349	2.41301	2.31599	2.28618	2.09219	2.019	2.13079
Th							Th	0.935811	1.01029	0.969653	0.965933	1.19211	2.92064	1.66008	1.20225	1.11639	1.63938	0.855664	1.21299	1.45664	1.28451	0.876898	0.933714	0.893751	1.18424	0.983893	1.05153		1.39156	0.952383	1.25884	1.30065	0.840944	1.02379	1.1921	0.948859	1.2468	1.06565	1.47688	1.66603		0.842899	0.921019	0.905575	0.924627	0.864189	0.844425	0.911468	0.920596
U							U	1.07126	0.923661	0.848157	0.892355	1.15595	2.05245	1.5395	1.17733	1.10577	1.18718	0.879962	1.44255	1.0863	1.01246	0.830022	0.923356	0.839289	0.941586	0.885969	0.951194		1.06243	0.851132	1.01281	1.2582	0.791752	0.798556	1.052	0.952739	1.03244	0.927303	0.99249	1.312		0.768581	0.78168	0.862951	0.786403	0.781869	0.731804	0.833898	0.844552
Cd							Cd	3.21459	3.77429	4.49684	3.72376	3.1438	4.62132	3.60427	4.11458	3.85924	3.76398	3.4906	3.71821	3.5736	3.42663	4.06664	4.12114	3.91564	3.69425	4.45488	4.41288		3.43648	3.77275	3.54152	3.38768	4.55726	4.40172	4.26189	3.76786	3.98304	31.7774	4.97862	4.21861		3.69689	3.35294	4.01861	3.34476	3.84794	3.52949	2.93536	2.76622
Tl							Tl	2.5645	1.93541	2.11982	2.02759	1.83051	2.53484	2.36351	2.29879	2.27526	2.40055	2.60187	2.41675	2.10152	2.03062	2.03491	2.14828	1.91558	2.18114	2.1396	2.20431		2.18241	1.92273	2.07069	2.13402	1.89925	1.91842	2.18971	1.99355	2.15686	2.6749	2.10135	2.34098		1.93516	1.99371	2.06346	1.91166	2.15519	1.89461	1.81943	1.8617
Other trace elements							Other trace elements
Cs							Cs	1.22072	1.19745	1.34672	1.30128	1.03618	1.47438	1.28058	1.31573	1.32134	1.34753	1.29628	1.37209	1.2992	1.27694	1.30424	1.31999	1.21258	1.13464	1.3769	1.13926		1.25787	1.16213	1.17883	1.19106	1.21835	1.24395	1.20459	1.18563	1.21237	1.27252	1.26095	1.24516		1.19028	1.22493	1.33598	1.21016	1.31034	1.20108	1.17726	1.21108
Ga							Ga	0.968131	0.996134	1.08197	1.05906	0.837538	1.151	0.998917	1.02198	1.00315	1.04621	0.97807	1.05747	1.08288	1.02948	1.04649	1.05281	1.00448	1.08564	1.08628	1.08735		1.00596	1.00006	0.986582	1.00215	1.00384	1.03395	1.00283	0.987672	1.00118	0.982566	1.00827	1.00324		0.977348	0.992941	1.04264	1.0773	1.02006	0.978169	1.00661	1.0184
Ge							Ge	1.35199	1.08075	1.23815	1.23988	1.28897	1.55667	1.44867	1.30293	1.25375	1.26777	1.21841	1.52306	1.36782	1.24598	1.23853	1.13195	1.09334	1.12976	1.13783	1.1369		1.32273	1.1825	1.30347	1.28371	1.09085	1.08563	1.22557	1.11405	1.20268	1.07692	1.19513	1.54814		1.06778	1.1518	1.11474	1.24073	1.11356	1.13941	1.06703	1.13351
Rb							Rb	1.5375	1.12716	1.23257	1.18581	1.12674	1.58577	1.41681	1.43715	1.45246	1.49967	1.4646	1.51488	1.27419	1.25085	1.2528	1.29255	1.16028	1.02783	1.27969	1.00183		1.26623	1.06158	1.25339	1.21647	1.09712	1.05713	1.16537	1.13814	1.15745	1.71136	1.21449	1.44289		1.1408	1.2031	1.19991	1.0646	1.24624	1.14678	1.09271	1.08592
Sr							Sr	1.30417	0.9888	1.09284	1.06705	1.04944	1.30096	1.18116	1.19973	1.10792	1.12149	1.24643	1.29314	1.1132	1.08764	1.12978	1.19582	1.03336	1.02388	1.12685	1.02208		1.18572	1.11419	1.23863	1.0702	1.08262	1.09499	1.11208	1.12327	1.17377	1.04943	1.10565	1.20123		1.0015	1.03452	1.06463	0.997754	1.08403	1.01443	0.959008	0.948874
Zr							Zr	2.51901	1.0636	1.10959	1.22375	3.72865	4.07635	4.23072	3.78073	2.67338	2.58998	1.59623	4.40379	1.781	1.81188	1.12187	1.35379	0.784152	0.787245	1.12278	0.893249		2.28801	1.54981	2.46542	2.69276	0.993016	1.05336	2.04012	1.3593	2.27468	2.41842	2.13162	4.08365		0.955014	1.02798	0.837843	0	1.21187	0.905717	0.76951	0.63267
Hf							Hf	2.37107	1.10615	1.05882	1.19096	3.49652	3.9402	4.19951	3.5267	2.51293	2.38999	1.59067	4.05984	1.68922	1.78519	1.00281	1.32445	0.77894	0.866312	1.06979	0.98124		2.15577	1.52377	2.40206	2.72099	0.983332	0.968315	2.05532	1.32417	2.20984	2.21393	1.9661	3.93846		0.943353	1.00959	0.858927	0.918334	1.11081	0.845899	0.767504	0.656121
Nb							Nb	1.29926	0.901324	0.999958	0.975585	1.24507	1.37435	1.29972	1.3441	1.30619	1.12962	1.00006	1.30187	1.42886	1.08829	0.99285	1.0252	0.900912	0.888382	1.01034	0.874328		1.29827	0.945755	1.06185	1.22864	0.888474	0.879151	1.02846	0.943426	1.09102	1.22672	1.07478	1.18628		0.86957	0.916555	0.907091	0.972872	0.938785	0.886684	0.895948	0.896231
Ta							Ta	1.216	0.983846	0.991473	0.926527	1.29185	1.58786	1.29352	1.46608	1.64139	1.13231	1.07952	1.33328	1.08245	1.20418	1.20671	1.18371	0.949374	0.946066	1.13497	1.01445		1.18691	0.96443	1.1407	1.09899	0.872607	0.850796	1.07491	0.940085	1.12672	1.39479	1.13698	1.26736		0.866313	0.935941	0.915637	0.930352	0.960133	0.825509	0.925188	0.879384
La							La	1.09509	1.02211	0.958954	1.04517	1.31996	1.41985	1.27137	1.27414	1.16988	1.32495	0.907254	1.35477	1.2294	1.13749	0.942532	0.966511	0.973024	1.18277	1.03623	1.1262		1.33507	1.05809	1.24237	1.25736	0.973118	0.882294	1.25357	1.012	1.08023	1.08101	1.23455	1.78407		0.982898	1.01662	1.01876	0.916122	0.968467	0.927587	0.967609	0.971834
Ce							Ce	1.0606	0.976525	0.918176	0.988185	1.31952	1.41883	1.22197	1.26643	1.1026	1.27361	0.925844	1.30216	1.19798	1.08139	0.900726	0.924804	0.953352	1.09937	1.003	1.0598		1.33718	1.02996	1.22288	1.24331	0.933808	0.869601	1.20464	0.9749	1.04449	1.10199	1.21077	1.77159		0.940818	0.978016	0.958932	0.857946	0.933764	0.895755	0.938659	0.93082
Pr							Pr	1.07758	0.977614	0.921141	1.01282	1.34836	1.43226	1.25856	1.26933	1.15707	1.28166	0.918842	1.28362	1.22193	1.07786	0.934776	0.982119	0.976655	1.11563	0.975599	1.04889		1.34321	0.995897	1.21533	1.2752	0.938045	0.885833	1.1675	0.979287	1.03962	1.12321	1.20123	1.7775		0.952965	0.993598	0.946515	0.849775	0.926712	0.898269	0.932779	0.922549
Nd							Nd	1.09345	0.969809	0.945715	1.02898	1.35087	1.42727	1.26661	1.2683	1.15933	1.29959	0.90706	1.29897	1.2282	1.07907	0.960415	0.97427	0.982807	1.14795	1.00213	1.07773		1.35717	1.00268	1.22088	1.2746	0.920132	0.926544	1.1594	1.00592	1.04868	1.14136	1.22943	1.76248		0.95249	0.974373	0.951181	0.840367	0.933856	0.898956	0.924506	0.926472
Sm							Sm	1.07879	1.00746	0.961185	1.0719	1.37281	1.45849	1.2912	1.29658	1.17855	1.29702	0.948767	1.28208	1.34605	1.13007	1.00701	1.01653	0.972474	1.17213	1.03227	1.09309		1.35837	1.01412	1.23333	1.33889	0.916416	0.980313	1.1536	1.02678	1.08535	1.1776	1.24876	1.76571		0.935909	0.977501	0.947552	0.894085	1.00207	0.914401	0.940709	0.974548
Eu							Eu	1.01404	0.988021	1.0217	1.07838	1.08489	1.16826	1.1841	1.13896	1.04469	0.984672	0.887002	1.14499	1.20334	1.03709	1.01565	1.02891	1.00268	1.17263	1.00691	1.13881		1.06986	0.998929	1.03806	1.14619	0.903805	0.957145	1.08351	1.02906	1.06233	0.846878	1.03101	1.21837		0.989236	0.964898	0.998943	0.982595	0.953109	0.934255	0.975814	0.999449
Gd							Gd	1.04818	1.02244	1.00646	1.12245	1.25598	1.51306	1.24607	1.22248	1.18509	1.33728	0.935452	1.31676	1.52546	1.1641	1.01353	1.0131	0.962699	1.23908	1.04185	1.11864		1.2833	1.02695	1.18569	1.38332	0.892775	0.924093	1.14952	1.0309	1.16007	1.04742	1.23254	1.66713		0.947584	1.00839	1.00101	0.933192	1.04331	0.901198	0.999907	1.0045
Tb							Tb	1.07053	1.03693	0.984457	1.0858	1.18191	1.5939	1.25009	1.18588	1.20455	1.30523	0.968905	1.31257	1.4881	1.1487	0.979343	1.03878	0.949047	1.19733	1.00204	1.07196		1.21644	0.968154	1.15868	1.37898	0.879658	0.867859	1.10857	1.06808	1.14153	0.972875	1.13514	1.50891		0.936555	0.991048	0.996757	0.943029	1.09019	0.903014	0.998256	0.996112
Dy							Dy	1.11964	1.03642	0.972451	1.05054	1.15136	1.6478	1.19731	1.15351	1.22867	1.30903	0.958418	1.30054	1.38577	1.10437	0.990393	1.04171	0.910328	1.13739	0.948496	1.00856		1.1881	0.953772	1.13347	1.37988	0.843601	0.843311	1.07184	1.0757	1.10674	0.9103	1.08965	1.33596		0.923563	0.941818	0.98581	0.943548	1.16676	0.89412	0.979487	0.954083
Y							Y	1.21314	1.02101	1.0779	1.11787	1.32066	1.85029	1.2472	1.22331	1.31087	1.54527	0.997592	1.48961	1.3865	1.13898	1.12591	1.13948	0.948874	1.06626	1.01851	0.972368		1.27771	0.929074	1.18696	1.37672	0.867131	0.951479	1.05282	1.17954	1.17457	0.950608	1.14903	1.27036		0.939675	0.971743	1.00394	1.00046	1.3961	0.943364	1.00562	0.988261
Ho							Ho	1.10966	0.990657	0.964298	0.993335	1.18598	1.69274	1.21641	1.17301	1.26482	1.37887	0.971199	1.33059	1.34423	1.06401	0.988954	1.05777	0.916926	1.109	0.935855	0.98932		1.19074	0.918259	1.12938	1.36653	0.837262	0.868745	1.04476	1.08121	1.09921	0.887125	1.05523	1.24101		0.911978	0.942358	0.969311	0.922712	1.25441	0.90462	0.962903	0.915601
Er							Er	1.21194	1.00146	0.993972	1.05622	1.2917	1.73635	1.30417	1.24731	1.2997	1.44955	0.99951	1.45866	1.34905	1.08349	1.04112	1.08245	0.915198	1.11513	0.969715	1.00388		1.2446	0.931563	1.16278	1.39737	0.847286	0.888827	1.05343	1.15392	1.12992	0.924443	1.07881	1.28283		0.93453	0.945944	0.978856	0.939944	1.32775	0.911865	0.961569	0.941542
Tm							Tm	1.29507	1.03852	1.02702	1.06273	1.38909	1.85006	1.40149	1.30985	1.33839	1.51649	1.03673	1.58791	1.37025	1.11808	1.06581	1.13052	0.897281	1.13623	0.991417	1.03853		1.28211	0.932231	1.19963	1.43876	0.850922	0.927711	1.08105	1.15357	1.20183	0.986916	1.11807	1.30573		0.91983	0.94318	1.00092	0.973291	1.39678	0.903014	0.956538	0.952558
Yb							Yb	1.34297	1.04606	1.03873	1.07666	1.45396	1.94623	1.49845	1.39291	1.355	1.51977	1.01401	1.6862	1.37811	1.16275	1.08022	1.15558	0.881022	1.12844	0.997568	1.02984		1.32233	0.954078	1.19627	1.48501	0.853078	0.909719	1.11416	1.14508	1.22689	0.992539	1.12584	1.38734		0.907757	0.910388	1.01731	0.975882	1.39708	0.896578	0.945967	0.93896
Lu							Lu	1.38488	1.06714	1.05107	1.07756	1.51577	1.95097	1.61855	1.45487	1.38938	1.5144	1.02704	1.79375	1.37025	1.16747	1.06957	1.13644	0.873751	1.1156	0.989647	1.03704		1.31964	0.96903	1.20184	1.54594	0.863694	0.913536	1.1636	1.14277	1.27132	1.02503	1.12409	1.4764		0.923175	0.932542	1.01757	0.968384	1.33935	0.886625	0.943129	0.955368
REE							REE
Igeo-XJR							K	0.547866	0.998067	0.857777	0.963375	0.73932	0.61345	0.59234	0.678619	0.747166	0.758854	0.655297	0.593772	0.794663	0.80353	0.844427	0.804519	1.01188	1.00024	0.896584	1.06836		0.761392	0.905831	0.717152	0.770066	0.994253	1.00777	0.807564	0.882012	0.776593	0.791305	0.79076	0.585938		0.949105	0.895316	0.953091	0.970362	0.856845	0.968538	1.06535	1.12979
Mn							Mn	1.31214	2.07907	1.89123	2.15431	1.59821	2.03059	1.91999	1.99583	1.88337	1.62664	1.47725	1.95112	1.98589	1.9562	1.95669	1.89485	2.08421	2.16813	2.12682	1.8646		1.65796	1.62165	1.83411	1.62755	1.85529	1.59981	1.7761	1.82495	1.76679	1.40775	1.55484	1.86385		1.78391	1.90244	2.16152	1.86768	1.74719	1.91714	2.18538	2.35891
Ni							Ni	1.86647	1.36635	1.5283	1.4494	3.08706	1.85862	8.06614	3.69446	3.08174	4.24238	4.21027	4.42846	4.40992	4.18754	4.27595	5.65237	6.57563	0.0856765	0.0261598	0.0366826		-0.0839511	-0.0731774	-0.122971	0.425787	1.46368	1.57181	1.53753	1.47482	1.50632	-0.304769	-0.111071	-0.263744		-0.0661051	0.0147804	-0.0419548	-0.108598	-0.0496908	3.97349	0.0838107	0.161142
Cu							Cu	0.704351	0.837496	0.979568	0.845	0.792231	1.00569	1.69446	1.02399	0.84819	0.800377	0.903028	0.939043	0.93113	0.841009	1.09855	1.27222	1.18081	0.791083	1.19769	1.01117		0.981606	0.907142	0.991013	0.96313	0.949182	0.849243	0.932173	0.942077	0.896552	0.813272	0.879314	0.747632		0.760001	0.882135	0.820771	0.83166	0.838968	0.89106	0.795827	0.853413
Zn							Zn	1.36238	1.1948	1.44027	1.25855	1.21418	1.59024	1.47204	1.37715	1.41542	1.37768	1.32323	1.40063	1.28783	1.2111	1.32409	1.31823	1.20572	1.22999	1.47942	1.3903		1.2599	1.4219	1.31818	1.24286	1.48356	1.5072	1.63534	1.43026	1.44491	3.58522	1.67675	1.65781		1.22228	1.16775	1.36721	1.20797	1.28978	1.15004	1.01201	0.990768
Pb							Pb	1.19562	1.23812	1.25541	1.26198	1.08451	1.3811	1.24077	1.19209	1.16564	1.18145	1.03522	1.33063	1.20947	1.14917	1.22122	1.24644	1.17994	1.31852	1.41545	1.42512		1.29752	1.10605	1.06075	1.11272	1.22098	1.17208	1.21118	1.14794	1.14356	2.40543	1.3662	1.43722		1.04959	1.09996	1.27083	1.21163	1.19294	1.06501	1.01364	1.09139
Cd							Cd	1.68464	1.9162	2.16891	1.89676	1.65251	2.20831	1.84971	2.04075	1.94832	1.91226	1.80347	1.89461	1.83738	1.77679	2.02384	2.04304	1.96925	1.88528	2.15539	2.14172		1.78093	1.91562	1.82437	1.7603	2.18817	2.13807	2.09149	1.91375	1.99387	4.98993	2.31575	2.07677		1.88631	1.74543	2.0067	1.7419	1.94409	1.81946	1.55354	1.46791
RI							CfM
						578.8	Mn	1.3604	4.21717	3.18193	4.28853	2.23842	2.50639	2.24153	2.70663	2.75657	2.3433	1.82446	2.29596	3.14772	3.118	3.27782	2.99188	4.29077	4.49551	3.91586	3.89064	0	2.40273	2.78749	2.55701	2.37941	3.59744	3.0546	2.76589	3.12491	2.64271	2.09952	2.32326	2.13269	0	3.26831	3.3471	4.26399	3.54129	2.87647	3.65791	4.84572	5.79561
						48.5	Ni	1.99773	2.5732	2.47423	2.63093	6.28247	2.22474	158.753	8.78557	6.32577	14.3629	12.1299	12.7856	16.8928	14.6412	16.3588	40.4639	96.5134	1.06144	0.91299	1.09588	0	0.718351	0.861031	0.658557	1.03443	2.74227	2.99588	2.34433	2.45155	2.20619	0.640619	0.732165	0.488041	0	0.906598	0.904536	0.925773	0.9	0.827835	15.2144	1.12907	1.2633
						31.5	Cu	0.892698	1.78349	1.69143	1.73048	1.28032	1.23175	1.91714	1.38	1.34508	1.32159	1.2254	1.13841	1.51524	1.43937	1.80825	1.94317	2.29397	1.73079	2.05651	2.15333	0	1.50349	1.69873	1.4254	1.50127	1.91968	1.81556	1.54095	1.6946	1.44571	1.39048	1.4546	0.98381	0	1.6073	1.65016	1.68349	1.72698	1.5327	1.79619	1.84952	2.04127
						113.8	Zn	1.40861	2.28471	2.32777	2.30492	1.71529	1.8471	1.64323	1.76274	1.99297	1.97188	1.63972	1.56766	1.94025	1.86028	2.11424	2.00615	2.33392	2.34622	2.5	2.80053	0	1.82337	2.42707	1.78822	1.8225	2.78032	2.86467	2.50879	2.37698	2.11424	9.49736	2.52812	1.84886	0	2.21441	2.01142	2.4587	2.24165	2.0949	2.14938	2.14851	2.24517
						38.69	Pb	1.25485	2.35436	2.04782	2.31042	1.56785	1.59783	1.39984	1.55053	1.67614	1.72112	1.34298	1.49341	1.83768	1.78211	1.96873	1.90876	2.29258	2.4947	2.39157	2.86896	0	1.87154	1.94986	1.49599	1.66529	2.31765	2.27087	1.86973	1.95451	1.71569	4.1923	2.03851	1.58671	0	1.96459	1.9191	2.29982	2.24735	1.9589	2.02636	2.15094	2.40734
						1.03	Cd	1.76117	3.76699	3.85728	3.58738	2.32427	2.83495	2.13495	2.79223	2.8835	2.85631	2.28738	2.20777	2.83981	2.7534	3.43398	3.31553	3.96214	3.69515	3.99417	4.71456	0	2.6165	3.41748	2.53981	2.60874	4.53107	4.43592	3.44175	3.3233	3.0932	25.1456	3.93689	2.47184	0	3.50874	3.00194	3.8301	3.24563	3.29709	3.41845	3.12718	3.12524
							ErM
						1	Mn	1.3604	4.21717	3.18193	4.28853	2.23842	2.50639	2.24153	2.70663	2.75657	2.3433	1.82446	2.29596	3.14772	3.118	3.27782	2.99188	4.29077	4.49551	3.91586	3.89064	0	2.40273	2.78749	2.55701	2.37941	3.59744	3.0546	2.76589	3.12491	2.64271	2.09952	2.32326	2.13269	0	3.26831	3.3471	4.26399	3.54129	2.87647	3.65791	4.84572	5.79561
						5	Ni	9.98866	12.866	12.3711	13.1546	31.4124	11.1237	793.763	43.9278	31.6289	71.8144	60.6495	63.9278	84.4639	73.2062	81.7938	202.32	482.567	5.30722	4.56495	5.47938	0	3.59175	4.30515	3.29278	5.17216	13.7113	14.9794	11.7216	12.2577	11.0309	3.20309	3.66082	2.44021	0	4.53299	4.52268	4.62887	4.5	4.13918	76.0722	5.64536	6.31649
						5	Cu	4.46349	8.91746	8.45714	8.65238	6.40159	6.15873	9.58571	6.9	6.7254	6.60794	6.12698	5.69206	7.57619	7.19683	9.04127	9.71587	11.4698	8.65397	10.2825	10.7667	0	7.51746	8.49365	7.12698	7.50635	9.59841	9.07778	7.70476	8.47302	7.22857	6.95238	7.27302	4.91905	0	8.03651	8.25079	8.41746	8.63492	7.66349	8.98095	9.24762	10.2063
						1	Zn	1.40861	2.28471	2.32777	2.30492	1.71529	1.8471	1.64323	1.76274	1.99297	1.97188	1.63972	1.56766	1.94025	1.86028	2.11424	2.00615	2.33392	2.34622	2.5	2.80053	0	1.82337	2.42707	1.78822	1.8225	2.78032	2.86467	2.50879	2.37698	2.11424	9.49736	2.52812	1.84886	0	2.21441	2.01142	2.4587	2.24165	2.0949	2.14938	2.14851	2.24517
						5	Pb	6.27423	11.7718	10.2391	11.5521	7.83923	7.98914	6.99922	7.75265	8.38072	8.60558	6.71491	7.46705	9.18842	8.91057	9.84363	9.54381	11.4629	12.4735	11.9579	14.3448	0	9.35772	9.74929	7.47997	8.32644	11.5883	11.3544	9.34867	9.77255	8.57844	20.9615	10.1926	7.93357	0	9.82295	9.5955	11.4991	11.2368	9.79452	10.1318	10.7547	12.0367
						30	Cd	52.835	113.01	115.718	107.621	69.7282	85.0485	64.0485	83.767	86.5049	85.6893	68.6214	66.233	85.1942	82.6019	103.019	99.466	118.864	110.854	119.825	141.437	0	78.4951	102.524	76.1942	78.2621	135.932	133.078	103.252	99.699	92.7961	754.369	118.107	74.1553	0	105.262	90.0583	114.903	97.3689	98.9126	102.553	93.8155	93.7573
							RI	76.3303	153.067	152.295	147.574	119.335	114.674	878.281	146.817	137.989	177.032	145.577	147.184	191.511	176.894	209.09	326.043	630.989	144.131	153.046	178.719	0	103.188	130.287	98.4392	103.469	177.208	174.408	137.302	135.704	124.391	797.083	144.085	93.4297	0	133.137	117.786	146.171	127.524	125.481	203.546	126.457	130.358
	Table2 The resultes of Pearson correlation in bed sediments from Changsha dam reservoir (DS) in lower reach of the Xiangjiang River, China.
		SiO2	TiO2	Al2O3	Fe2O3	MnO	MgO	CaO	K2O	LOI	Ba	Sc	V	Cr	Mn	Co	Ni	Cu	Zn	Pb	Th	U	Cd	Tl	Cs	Ga	Ge	Rb	Sr	Zr	Hf	Nb	Ta	La	Y	REE
	SiO2	1
	TiO2	-0.721**	1
	Al2O3	-0.989**	0.658**	1
	Fe2O3	-0.896**	0.894**	0.861**	1
	MnO	-0.868**	0.600**	0.887**	0.803**	1
	MgO	-0.725**	0.19	0.763**	0.428**	0.696**	1
	CaO	0.054	-0.292	-0.096	-0.324*	-0.181	0.382**	1
	K2O	-0.390**	0.043	0.452**	0.164	0.359*	0.339*	-0.149	1
	Na2O	0.844**	-0.730**	-0.840**	-0.834**	-0.784**	-0.621**	0.102	-0.02
	P2O5	-0.867**	0.540**	0.831**	0.648**	0.606**	0.699**	0.328*	0.315*
	LOI	-0.972**	0.718**	0.937**	0.862**	0.791**	0.698**	0.076	0.246	1
	Ba	-0.877**	0.605**	0.895**	0.782**	0.873**	0.666**	-0.153	.510**	0.789**	1
	Sc	-0.976**	0.791**	0.955**	0.911**	0.840**	0.664**	-0.059	0.316*	0.957**	0.879**	1
	V	-0.961**	0.780**	0.945**	0.932**	0.901**	0.654**	-0.13	0.300*	0.923**	0.891**	0.978**	1
	Cr	0.113	-0.09	-0.108	-0.09	-0.024	-0.02	-0.035	-0.068	-0.151	-0.084	-0.132	-0.064	1
	Mn	-0.866**	0.611**	0.881**	0.810**	0.995**	0.688**	-0.173	0.335*	0.793**	0.887**	0.853**	0.915**	-0.017	1
	Co	-0.725**	0.626**	0.699**	0.718**	0.681**	0.455**	-0.131	0.193	0.696**	0.677**	0.731**	0.763**	0.531**	0.699**	1
	Ni	0.219	-0.196	-0.207	-0.197	-0.099	-0.076	-0.019	-0.092	-0.257	-0.165	-0.242	-0.169	0.989**	-0.095	0.440**	1
	Cu	-0.668**	0.181	0.701**	0.427**	0.636**	0.853**	0.281	0.321*	0.623**	0.645**	0.608**	0.620**	0.373*	0.639**	0.673**	0.308*	1
	Zn	-0.083	-0.076	0.131	-0.04	-0.051	0.034	-0.13	0.662**	-0.036	0.249	0.049	-0.012	-0.087	-0.051	-0.042	-0.105	0.137	1
	Pb	-0.481**	0.12	0.546**	0.294*	0.585**	0.470**	-0.085	0.738**	0.340*	0.616**	0.434**	0.404**	-0.111	0.386**	0.228	-0.16	0.521**	0.847**	1
	Th	-0.001	0.135	0.025	0.033	0.074	0.161	0.033	-0.021	-0.052	0.099	0.089	0.086	0.027	0.093	0.027	-0.003	0.075	0.003	0.11	1
	U	-0.064	0.178	0.088	0.081	0.216	0.279	0.103	0.03	-0.011	0.181	0.121	0.153	0.118	0.225	0.13	0.104	0.201	-0.045	0.116	0.851**	1
	Cd	-0.016	-0.107	0.064	-0.077	-0.097	-0.047	-0.188	0.631**	-0.109	0.202	-0.019	-0.069	-0.072	-0.096	-0.077	-0.081	0.071	0.992**	0.805**	-0.025	-0.071	1
	Tl	-0.688**	0.16	0.751**	0.427**	0.603**	0.742**	0.086	0.678**	0.591**	0.733**	0.642**	0.621**	-0.135	0.608**	0.387**	-0.188	0.705**	0.471**	0.817**	0.151	0.194	0.402**	1
	Cs	-0.826**	0.306*	0.869**	0.579**	0.782**	0.878**	0.098	0.534**	0.761**	0.805**	0.788**	0.772**	-0.086	0.785**	0.525**	-0.166	0.798**	0.215	0.633**	0.105	0.135	0.14	0.855**	1
	Ga	-0.960**	0.634**	0.971**	0.847**	0.884**	0.763**	-0.069	0.413**	0.904**	0.917**	0.958**	0.960**	-0.111	0.897**	0.695**	-0.208	0.714**	0.113	0.557**	0.119	0.164	0.046	0.787**	0.891**	1
	Ge	-0.877**	0.809**	0.857**	0.914**	0.846**	0.555**	-0.199	0.204	0.836**	0.807**	0.909**	0.942**	-0.084	0.860**	0.685**	-0.189	0.505**	-0.099	0.306*	0.205	0.26	-0.149	0.495**	0.658**	0.882**	1
	Rb	-0.577**	0.103	0.652**	0.364*	0.575**	0.603**	-0.142	0.754**	0.443**	0.702**	0.522**	0.512**	-0.082	0.574**	0.337*	-0.132	0.587**	0.576**	0.795**	0.054	0.073	0.540**	0.826**	0.829**	0.655**	0.379*	1
	Sr	-0.932**	0.543**	0.926**	0.745**	0.796**	0.814**	0.169	0.361*	0.923**	0.867**	0.927**	0.896**	-0.129	0.808**	0.658**	-0.223	0.752**	0.097	0.516**	0.03	0.065	0.02	0.758**	0.881**	0.940**	0.774**	0.606**	1
	Zr	0.791**	-0.360*	-0.799**	-0.647**	-0.691**	-0.592**	0.026	-0.294	-0.795**	-0.708**	-0.755**	-0.759**	0.115	-0.704**	-0.574**	0.181	-0.572**	-0.023	-0.368*	0.26	0.294	0.021	-0.635**	-0.739**	-0.802**	-0.602**	-0.548**	-0.807**	1
	Hf	0.783**	-0.366*	-0.791**	-0.643**	-0.675**	-0.565**	0.055	-0.303*	-0.786**	-0.696**	-0.749**	-0.750**	0.134	-0.689**	-0.548**	0.204	-0.551**	-0.039	-0.376*	0.287	0.341*	0.003	-0.622**	-0.742**	-0.793**	-0.594**	-0.560**	-0.801**	0.996**	1
	Nb	-0.517**	0.579**	0.514**	0.594**	0.511**	0.285	-0.302*	0.311*	0.426**	0.632**	0.551**	0.567**	-0.076	0.521**	0.371*	-0.146	0.272	0.177	0.366*	0.303*	0.349*	0.161	0.332*	0.402**	0.534**	0.642**	0.391**	0.413**	-0.163	-0.179	1
	Ta	-0.242	0.071	0.291	0.183	0.313*	0.396**	-0.05	0.387**	0.123	0.409**	0.216	0.243	-0.077	0.313*	0.093	-0.093	0.372*	0.387**	0.538**	0.308*	0.410**	0.368*	0.477**	0.396**	0.326*	0.211	0.524**	0.279	0.005	0.001	0.536**	1
	La	-0.554**	0.502**	0.585**	0.539**	0.591**	0.463**	-0.142	0.244	0.472**	0.579**	0.565**	0.574**	-0.168	0.581**	0.323*	-0.228	0.348*	0.046	0.382**	0.521**	0.545**	-0.014	0.484**	0.440**	0.591**	0.672**	0.284	0.487**	-0.177	-0.138	0.553**	0.380*	1
	Y	-0.471**	0.400**	0.485**	0.464**	0.525**	0.410**	-0.129	0.234	0.415**	0.497**	0.509**	0.524**	-0.17	0.526**	0.276	-0.217	0.279	-0.159	0.146	0.524**	0.555**	-0.188	0.373*	0.490**	0.541**	0.586**	0.342*	0.452**	-0.214	-0.216	0.584**	0.340*	0.555**	1
	REE	-0.554**	0.535**	0.580**	0.561**	0.591**	0.434**	-0.186	0.245	0.471**	0.591**	0.578**	0.586**	-0.178	0.582**	0.332*	-0.238	0.318*	0.023	0.350*	0.578**	0.595**	-0.028	0.454**	0.434**	0.592**	0.692**	0.291	0.483**	-0.161	-0.126	0.633**	0.396**	0.978**	0.689**	1
				* Correlation is significant at P < 0.05 level (two-tailed).
				** Correlation is significant at P < 0.01 level (two-tailed).
	Table3 The resultes of PCA analysis in bed sediments from Changsha dam reservoir (DS) in lower reach of the Xiangjiang River, China.
	Component matrix
		1	2	3	4	5	6		KMO and Bartlett examnination			Explanation of Total Variance
	SiO2	0.84	0.449	-0.175	0.096	-0.009	0.02		KMO Sampling suitability quantity.		Component	initial eigenvalue			Extract the sum of squared loads				Sum of squared rotational loads
	TiO2	0.018	0.947	-0.25	-0.026	-0.046	-0.004		Approximate chi square			Initial eigenvalue	Variance percentage	Accumulated%	Total	Variance percentage	Accumulated%	Total	Variance percentage	Accumulated%
	Al2O3	-0.493	0.839	-0.108	-0.035	-0.107	0.041				1	16.72	46.443	46.443	16.72	46.443	46.443	12.004	33.343	33.343
	Fe2O3	-0.579	0.135	0.658	-0.168	0.03	-0.055				2	8.637	23.993	70.436	8.637	23.993	70.436	11.066	30.739	64.083
	MgO	0.88	-0.327	0.119	0.071	0.199	-0.14				3	2.614	7.26	77.696	2.614	7.26	77.696	3.541	9.836	73.919
	CaO	0.863	-0.252	-0.061	0.121	0.344	-0.158				4	2.13	5.918	83.614	2.13	5.918	83.614	2.797	7.768	81.687
	K2O	0.911	-0.049	-0.071	0.044	-0.157	0.122				5	1.57	4.362	87.975	1.57	4.362	87.975	1.718	4.771	86.458
	Na2O	0.854	0.384	-0.191	0.12	-0.022	0.084				6	1.156	3.21	91.186	1.156	3.21	91.186	1.702	4.728	91.186
	P2O5	0.134	-0.355	-0.609	0.203	0.59	-0.205				7	0.782	2.173	93.358
	LOI	-0.775	0.126	-0.275	0.113	0.429	-0.201				8	0.509	1.415	94.774
	Ba	0.424	0.751	-0.005	0.034	-0.031	0.394				9	0.347	0.965	95.739
	Sc	-0.473	0.765	-0.133	-0.02	0.319	0.161				10	0.272	0.757	96.495
	V	-0.813	0.362	0.279	-0.057	0.273	0.051				11	0.219	0.609	97.104
	Cr	0.223	0.426	0.342	0.74	-0.153	-0.169				12	0.177	0.492	97.596
	Mn	-0.395	-0.01	0.738	-0.195	0.181	-0.115				13	0.143	0.396	97.992
	Co	-0.314	0.635	0.255	0.523	0.031	-0.095				14	0.116	0.323	98.315
	Ni	0.209	0.323	0.344	0.74	-0.141	-0.088				15	0.115	0.32	98.636
	Cu	0.725	-0.444	0.288	0.299	0.163	-0.127				16	0.103	0.287	98.923
	Zn	0.785	-0.522	-0.007	-0.003	-0.055	0.15				17	0.076	0.212	99.135
	Pb	0.772	-0.533	0.139	-0.072	-0.028	0.138				18	0.064	0.178	99.313
	Th	0.8	0.214	0.242	-0.234	0.159	-0.159				19	0.05	0.139	99.452
	U	0.878	0.253	0.227	-0.128	0.114	-0.174				20	0.046	0.128	99.58
	Cd	0.753	-0.625	0.072	0.003	-0.009	0.071				21	0.035	0.096	99.676
	Tl	0.908	-0.298	0.047	0.051	0.093	0.149				22	0.025	0.07	99.746
	Cs	0.768	-0.496	0.201	0.059	0.193	0.132				23	0.019	0.053	99.799
	Ga	-0.22	0.283	0.445	-0.047	0.509	0.535				24	0.017	0.047	99.846
	Ge	0.36	0.814	0.082	-0.134	0.125	-0.132				25	0.015	0.041	99.887
	Rb	0.911	-0.077	0.032	0.073	-0.08	0.279				26	0.011	0.03	99.917
	Sr	0.607	0.518	-0.235	0.22	0.37	0.197				27	0.008	0.022	99.939
	Zr	0.791	0.54	-0.141	-0.053	-0.069	-0.136				28	0.006	0.018	99.957
	Hf	0.822	0.493	-0.115	-0.064	-0.053	-0.167				29	0.005	0.013	99.97
	Nb	0.414	0.812	-0.075	-0.07	-0.154	0.129				30	0.003	0.009	99.979
	Ta	0.904	0.159	0.098	-0.041	-0.07	0.092				31	0.003	0.008	99.988
	La	0.735	0.367	0.118	-0.384	-0.011	-0.237				32	0.002	0.006	99.994
	Y	0.677	0.455	0.182	-0.225	0.13	-0.094				33	0.001	0.003	99.997
	REE	0.73	0.47	0.111	-0.366	-0.001	-0.212				34	0	0.001	99.999
											35	0	0.001	100
											36	0	0	100
		Table 4 Statistical results of Igeo values for heavy metals in DS and FS sediments Changsha section of the Xiangjiang River, Hunan Province, China.
			Sediments	Heavy metal	Mn	Ni	Cu	Pb	Zn	Cd
			DS (n = 52)	Minimum	1.31	-0.32	0	0.13	-0.3	-1.66
				Maximum	2.54	8.07	1.69	2.41	3.59	4.99
				Average	1.91	1.81	0.81	1.08	1.15	1.45
			FS (n = 92)	Minimum	0.69	-0.65	0.44	1.02	0.98	1.45
				Maximum	3	0.82	2.38	2.66	3.24	4.61
				Average	1.97	-0.04	1.17	1.78	1.95	3.47
			Table 5 The statistical results of adult non carcinogenic risk assessment for heavy metals in sediments
					Mn	Ni	Cu	Zn	Pb	Cd
				Min	0.1644	0.5752	0.0051	0.0402	0.0239	0.006
			YP	Mav	0.3312	3.2389	0.0089	0.0873	0.0678	0.0609
				Av	0.2311	0.7271	0.007	0.0638	0.0459	0.0124
				Min	0.12	0.0033	0.0016	0.0012	0.0412	0.5343
			FY	Max	0.2056	0.0204	0.0032	0.0065	0.0818	1.2579
				Av	0.1518	0.0101	0.0025	0.002	0.0615	0.9712
				Min	0.3365	0.0056	0.0025	0.0014	0.1426	0.0072
			SW	Max	0.712	0.1036	0.0034	0.0017	0.1789	0.0093
				Av	0.5243	0.0546	0.0029	0.0015	0.1587	0.008
			JG	Min	0.1589	0.0051	0.0015	0.0005	0.0686	0.0007
				Max	0.2789	0.1041	0.0018	0.0006	0.0862	0.0008
				Av	0.2154	0.0541	0.0017	0.0005	0.0788	0.0007
			Table 6 The statistical results of child non carcinogenic risk assessment for heavy metals in sediments
					Mn	Ni	Cu	Zn	Pb	Cd
				Min	0.1823	0.7286	0.0151	0.0602	0.0439	0.026
			YP	Max	0.467	4.9751	0.0289	0.1873	0.1878	0.1609
				Av	0.3247	0.9045	0.022	0.1238	0.1159	0.0935
				Min	0.3213	0.0153	0.003	0.0015	0.0512	0.5401
			FY	Max	0.523	0.0939	0.0269	0.0137	0.0879	2.4587
				Av	0.4223	0.0467	0.0202	0.016	0.07	0.9694
				Min	0.5321	0.0259	0.0202	0.0112	0.293	0.0519
			SW	Max	0.8585	0.4768	0.0269	0.0137	0.4202	0.0673
				Av	0.6953	0.0763	0.023	0.0123	0.3566	0.0579
				Min	0.4213	0.0153	0.0121	0.0039	0.0993	0.0017
			JG	Max	0.667	0.4768	0.0142	0.0048	0.1197	0.0038
				Av	0.5441	0.1225	0.0133	0.0044	0.1095	0.0028
[truncated: 158 more columns]
